# Supplementary material for: Untangling lineage introductions, persistence, and temporal heterogeneity of HP-PRRSV (sublineage 8.7)
Source: Research Square preprint supplement (doi:10.21203/rs.3.rs-3480374/v1), 2023-11-01
Supplement: Supplementary file 1 [file 31c7f8bd9341c26a9f41594b.xlsx]

## Sheet: introduction
Supplementary table 1 Subsampling strategy
Supplementary table 2 Original data of predictors for GLM
Supplementary table 3 Paired provincial distance

## Sheet: TableS1
taxa	location	cluster	remove	keep_default
14QY-GP5_Guangdong_QingYuan_2014_China_zhanglab/2014-5/Guangdong	Guangdong	0	0	1
KY798927/2014-12/Fujian	Fujian	0	0	1
KF768109/2012-9/Guangdong	Guangdong	0	0	1
MK943877/2014-12/Hubei	Hubei	0	0	1
KM377852/2012-3/Zhejiang	Zhejiang	0	0	1
MK943922/2016-10/Jiangxi	Jiangxi	0	0	1
MN508256/2013-11/Jiangsu	Jiangsu	0	0	1
11SH1-GD_Guangdong_2010_China_zhanglab/2010-11/Guangdong	Guangdong	0	0	1
121229ZJ-GP5_Guangdong_Zhanjiang_20121229_China_zhanglab/2012-12/Guangdong	Guangdong	2506	1	0
KF768106/2012-9/Guangdong	Guangdong	2506	0	1
JX215552/2010-2/Guangdong	Guangdong	2506	1	0
KP284090/2013-12/Guangxi	Guangxi	0	0	1
KX815412/2015-11/Hebei	Hebei	0	0	1
KR018783/2014-3/Guangdong	Guangdong	0	0	1
JX192637/2010-8/Guangdong	Guangdong	2510	0	1
KC263030/2011-2/Guangdong	Guangdong	2510	1	0
FJ-2016-0305_Fujian_2016_China_zhanglab/2016-3/Fujian	Fujian	0	0	1
GuangdongFoshanLuoCun_2010_09_06_China_zhanglab/2010-9/Guangdong	Guangdong	0	0	1
KJ855518/2010-1/Shanxi	Shanxi	0	0	1
JQ663556/2010-2/Beijing	Beijing	0	0	1
JQ663553/2010-2/Hebei	Hebei	0	0	1
KC282621/2010-2/Guangdong	Guangdong	0	0	1
KC282623/2010-2/Guangdong	Guangdong	0	0	1
GuangdongGuangzhouXintang_2010_09_06_China_zhanglab/2010-9/Guangdong	Guangdong	0	0	1
GuangdongGuangzhouHuadu_2016_09_06_China_zhanglab/2016-9/Guangdong	Guangdong	0	0	1
JQ663559/2010-2/Guangxi	Guangxi	0	0	1
HQ832186/2010-2/Guangxi	Guangxi	0	0	1
JN885618/2010-7/Guangdong	Guangdong	0	0	1
JQ663561/2010-2/Guangxi	Guangxi	0	0	1
KC527830/2011-6/Guangdong	Guangdong	0	0	1
JN885615/2010-8/Guangdong	Guangdong	0	0	1
KJ854752/2012-9/Yunnan	Yunnan	0	0	1
KY620014/2015-1/Sichuan	Sichuan	0	0	1
wang1_Guangdong_DongGuan_2104_China_zhanglab/2014-10/Guangdong	Guangdong	2530	1	0
wang3_Guangdong_DongGuan_2014_China_zhanglab/2014-10/Guangdong	Guangdong	2530	1	0
wj-30-GP5_Guangdong_Dongguan_20140121_China_zhanglab/2014-1/Guangdong	Guangdong	2530	0	1
wj-35-GP5_Guangdong_Dongguan_20140121_China_zhanglab/2014-1/Guangdong	Guangdong	2530	1	0
wj-NDP2-37-GP5_Guangdong_Dongguan_20140121_China_zhanglab/2014-1/Guangdong	Guangdong	2530	1	0
wj-NDP2-30-GP5_Guangdong_Dongguan_20140121_China_zhanglab/2014-1/Guangdong	Guangdong	2530	1	0
KC282639/2011-2/Guangdong	Guangdong	0	0	1
JX192635/2010-10/Guangdong	Guangdong	2537	0	1
JX192638/2010-9/Guangdong	Guangdong	2537	1	0
KJ854743/2011-2/Yunnan	Yunnan	0	0	1
KJ606960/2011-8/Guangdong	Guangdong	0	0	1
KJ854744/2012-9/Yunnan	Yunnan	0	0	1
KM013933/2013-11/Guangxi	Guangxi	0	0	1
KM233870/2013-9/Shaanxi	Shaanxi	0	0	1
KR612155/2012-9/Guangdong	Guangdong	0	0	1
KM233869/2013-9/Shaanxi	Shaanxi	0	0	1
JN543533/2015-9/Zhejiang	Zhejiang	0	0	1
HQ832175/2009-1/Shandong	Shandong	0	0	1
HQ832171/2009-1/Jiangsu	Jiangsu	0	0	1
HQ832230/2010-2/Anhui	Anhui	0	0	1
KF562305/2009-7/Zhejiang	Zhejiang	0	0	1
KF562274/2010-5/Anhui	Anhui	0	0	1
KF562302/2010-4/Shandong	Shandong	0	0	1
GU902194/2009-11/Henan	Henan	0	0	1
KM233865/2013-9/Shaanxi	Shaanxi	0	0	1
HQ832170/2009-1/Hubei	Hubei	0	0	1
KF562307/2009-5/Zhejiang	Zhejiang	0	0	1
HM027585/2014-6/Shandong	Shandong	0	0	1
HQ832108/2008-1/Anhui	Anhui	0	0	1
KF562304/2009-5/Jiangsu	Jiangsu	0	0	1
GDSBTgp5GuangdongChaozhou20161226_China_zhanglab/2016-12/Guangdong	Guangdong	0	0	1
KP771763/2012-9/Beijing	Beijing	0	0	1
JF268684/2009-11/Henan	Henan	0	0	1
KP771765/2011-7/Hebei	Hebei	0	0	1
HQ832099/2008-5/Shandong	Shandong	0	0	1
GU902193/2009-10/Henan	Henan	2558	1	0
HQ832243/2010-2/Henan	Henan	2558	0	1
JX876915/2011-2/Heilongjiang	Heilongjiang	2560	1	0
JX876916/2011-2/Heilongjiang	Heilongjiang	2560	1	0
JX876917/2011-2/Heilongjiang	Heilongjiang	2560	0	1
MK943928/2015-10/Hubei	Hubei	2562	1	0
MK943929/2015-10/Hubei	Hubei	2562	0	1
KF416317/2013-9/Henan	Henan	0	0	1
HQ832203/2010-2/Hubei	Hubei	0	0	1
14GZ-GP5_Guangdong_GuangZhou_2014_China_zhanglab/2014-5/Guangdong	Guangdong	2567	1	0
KF768123/2013-9/Guangdong	Guangdong	2567	1	0
KY508621/2016-8/Guangdong	Guangdong	2567	0	1
JQ997099/2011-11/Guizhou	Guizhou	2573	1	0
JQ997102/2011-11/Guizhou	Guizhou	2573	0	1
KT030967/2012-11/Sichuan	Sichuan	2574	1	0
KT030973/2013-3/Sichuan	Sichuan	2574	0	1
KP771746/2011-2/Chongqing	Chongqing	0	0	1
JX235370/2011-8/Guangdong	Guangdong	0	0	1
KT030991/2014-10/Sichuan	Sichuan	0	0	1
KC263024/2011-2/Guangdong	Guangdong	0	0	1
KF416318/2013-9/Henan	Henan	0	0	1
JX144910/2011-2/Hubei	Hubei	2577	0	1
JX144911/2011-2/Hubei	Hubei	2577	1	0
HQ832106/2008-1/Shandong	Shandong	0	0	1
KP284092/2013-2/Guangxi	Guangxi	0	0	1
HQ832120/2009-1/Anhui	Anhui	0	0	1
HQ832098/2007-8/Henan	Henan	0	0	1
HQ832220/2010-2/Hubei	Hubei	0	0	1
Guangdong2_2010_05_17_4-1_China_zhanglab/2010-5/Guangdong	Guangdong	0	0	1
HQ832179/2010-1/Beijing	Beijing	2583	0	1
HQ832180/2010-1/Beijing	Beijing	2583	1	0
JF268682/2009-7/Hubei	Hubei	0	0	1
HQ832156/2009-1/Hubei	Hubei	0	0	1
GuangdongZhongshan1_2010_05_31_China_zhanglab/2010-5/Guangdong	Guangdong	2587	1	0
KC282624/2010-2/Guangdong	Guangdong	2587	0	1
JQ663552/2010-2/Hebei	Hebei	0	0	1
JQ004523/2010-6/Guangdong	Guangdong	2588	0	1
KX228520/2015-12/Guangdong	Guangdong	2588	1	0
HQ832109/2008-1/Anhui	Anhui	2592	1	0
HQ832176/2009-1/Anhui	Anhui	2592	1	0
HQ832231/2010-2/Anhui	Anhui	2592	0	1
HQ832169/2009-1/Jiangsu	Jiangsu	0	0	1
HQ832173/2009-1/Zhejiang	Zhejiang	0	0	1
JQ828965/2009-1/Guangdong	Guangdong	0	0	1
KC415266/2010-2/Fujian	Fujian	0	0	1
KC454376/2011-2/Anhui	Anhui	0	0	1
HQ191493/2009-10/Guangxi	Guangxi	2598	0	1
HQ191496/2010-3/Guangxi	Guangxi	2598	1	0
HQ832103/2008-5/Jiangsu	Jiangsu	0	0	1
HQ832233/2010-2/Anhui	Anhui	0	0	1
JN543520/2014-8/Jiangxi	Jiangxi	0	0	1
KR612120/2010-5/Guangdong	Guangdong	0	0	1
KC282625/2010-2/Guangdong	Guangdong	0	0	1
HQ832115/2009-1/Anhui	Anhui	2603	0	1
HQ832116/2009-1/Anhui	Anhui	2603	1	0
HQ832125/2009-1/Anhui	Anhui	0	0	1
KF562297/2009-7/Jiangxi	Jiangxi	0	0	1
20140423GD6-GP5_Guangdong_20140423_China_zhanglab/2014-4/Guangdong	Guangdong	2609	0	1
20140423GD8-GP5_Guangdong_20140423_China_zhanglab/2014-4/Guangdong	Guangdong	2609	1	0
KP771778/2011-7/Beijing	Beijing	0	0	1
JN543514/2013-8/Zhejiang	Zhejiang	0	0	1
KY508624/2016-7/Guangdong	Guangdong	0	0	1
JX046303/2009-1/Guangxi	Guangxi	0	0	1
KJ854748/2011-2/Yunnan	Yunnan	0	0	1
GU168568/2009-3/Hubei	Hubei	0	0	1
GU977229/2009-11/Shandong	Shandong	0	0	1
HM027584/2014-6/Shandong	Shandong	0	0	1
KM186900/2013-9/Jilin	Jilin	0	0	1
KP771772/2012-9/Hebei	Hebei	0	0	1
JQ663550/2010-2/Fujian	Fujian	2625	0	1
KC415263/2012-9/Fujian	Fujian	2625	1	0
KM186894/2013-9/Jilin	Jilin	0	0	1
KC415262/2011-2/Fujian	Fujian	0	0	1
KC415259/2012-9/Fujian	Fujian	0	0	1
KF562271/2009-5/Anhui	Anhui	0	0	1
KF562280/2008-12/Jiangsu	Jiangsu	0	0	1
GuangdongJiangmen_2010_09_21_China_zhanglab/2010-9/Guangdong	Guangdong	0	0	1
JQ663560/2010-2/Guangxi	Guangxi	0	0	1
JX876909/2011-2/Heilongjiang	Heilongjiang	2631	1	0
JX876911/2011-2/Heilongjiang	Heilongjiang	2631	0	1
MF095239/2014-9/Jiangsu	Jiangsu	0	0	1
GuangdongZhongshan2_2010_06_25_China_zhanglab/2010-6/Guangdong	Guangdong	0	0	1
JF748718/2010-11/Guangdong	Guangdong	0	0	1
KC415255/2010-2/Fujian	Fujian	0	0	1
KP771766/2011-7/Guangdong	Guangdong	0	0	1
JN885614/2010-6/Guangdong	Guangdong	0	0	1
JQ663546/2010-2/Fujian	Fujian	0	0	1
JQ663562/2010-2/Guangxi	Guangxi	0	0	1
KT208327/2015-11/Guangdong	Guangdong	0	0	1
HQ832207/2010-2/Hunan	Hunan	0	0	1
GuangdongFoshan3_2010_06_24_China_zhanglab/2010-6/Guangdong	Guangdong	0	0	1
HQ832123/2009-1/Anhui	Anhui	0	0	1
KF562299/2010-4/Jiangxi	Jiangxi	0	0	1
HQ832146/2009-1/Hubei	Hubei	0	0	1
JQ309823/2015-9/Guangxi	Guangxi	0	0	1
HQ832147/2009-1/Hubei	Hubei	0	0	1
HQ832150/2009-1/Hubei	Hubei	0	0	1
JQ663548/2010-2/Fujian	Fujian	2648	1	0
JQ663549/2010-2/Fujian	Fujian	2648	1	0
KP780882/2014-11/Fujian	Fujian	2648	0	1
HQ832184/2010-2/Guangxi	Guangxi	2650	0	1
HQ832185/2010-2/Guangxi	Guangxi	2650	1	0
JF796180/2010-11/Guangdong	Guangdong	0	0	1
JQ663542/2010-2/Beijing	Beijing	0	0	1
JQ663544/2010-2/Beijing	Beijing	0	0	1
GuangdongFoshan_2010_09_06_China_zhanglab/2010-9/Guangdong	Guangdong	0	0	1
HM027582/2013-6/Shandong	Shandong	0	0	1
HY-GD-11-GP5_Guangdong_Heyuan_2011_China_zhanglab/2011-11/Guangdong	Guangdong	0	0	1
HQ832187/2010-2/Guangxi	Guangxi	0	0	1
HQ832188/2010-2/Guangxi	Guangxi	0	0	1
GuangdongGuangzhouPianyu_2010_09_06_China_zhanglab/2010-9/Guangdong	Guangdong	0	0	1
GuangdongFoshan-88_2010_09_06_China_zhanglab/2010-9/Guangdong	Guangdong	0	0	1
HQ832124/2009-1/Anhui	Anhui	0	0	1
HQ832253/2010-2/Hubei	Hubei	0	0	1
HQ832182/2010-1/Guangxi	Guangxi	2662	0	1
HQ832183/2010-2/Guangxi	Guangxi	2662	1	0
HQ832181/2010-2/Guangxi	Guangxi	2662	1	0
HQ832189/2010-2/Guangxi	Guangxi	2662	1	0
13GZLG5-GP5_Guangdong_Guangzhou_2013_China_zhanglab/2013-12/Guangdong	Guangdong	2673	1	0
13GZLG-GD_Guangdong_Guangzhou_2013_China_zhanglab/2013-12/Guangdong	Guangdong	2673	1	0
YF7-8-GP5_Guangdong_Yangjiang_20130512_China_zhanglab/2013-5/Guangdong	Guangdong	2673	0	1
GU977223/2009-11/Shandong	Shandong	0	0	1
GU977227/2009-4/Shandong	Shandong	2675	1	0
HM016159/2009-11/Shandong	Shandong	2675	0	1
GU977233/2009-10/Shandong	Shandong	2675	1	0
GU977224/2009-11/Shandong	Shandong	0	0	1
HQ832196/2010-2/Henan	Henan	2680	0	1
HQ832199/2010-2/Henan	Henan	2680	1	0
JQ663540/2010-2/Jiangxi	Jiangxi	0	0	1
JQ798275/2011-2/Zhejiang	Zhejiang	0	0	1
JX317649/2010-8/Jiangxi	Jiangxi	0	0	1
JX141472/2009-9/Henan	Henan	2685	1	0
JX163057/2009-9/Henan	Henan	2685	0	1
JX174280/2009-9/Henan	Henan	2685	1	0
JX162590/2009-9/Henan	Henan	2685	1	0
KF562270/2008-12/Anhui	Anhui	0	0	1
KF562283/2009-6/Jiangsu	Jiangsu	0	0	1
KF562284/2009-7/Jiangsu	Jiangsu	0	0	1
KF562300/2009-5/Shandong	Shandong	0	0	1
HQ832104/2008-5/Jiangsu	Jiangsu	0	0	1
HQ832190/2010-2/Guangxi	Guangxi	2694	0	1
HQ832191/2010-2/Guangxi	Guangxi	2694	1	0
JQ663541/2010-2/Beijing	Beijing	0	0	1
KF562311/2010-5/Zhejiang	Zhejiang	0	0	1
HQ832105/2008-1/Jiangsu	Jiangsu	0	0	1
KF562276/2010-11/Anhui	Anhui	0	0	1
KF562295/2010-7/Jiangsu	Jiangsu	0	0	1
JQ663557/2010-2/Beijing	Beijing	0	0	1
JX192634/2010-3/Guangdong	Guangdong	0	0	1
JQ663568/2010-2/Beijing	Beijing	0	0	1
KM377844/2014-5/Guangxi	Guangxi	0	0	1
KP771767/2011-7/Beijing	Beijing	0	0	1
KM377846/2014-5/Guangdong	Guangdong	2702	1	0
KX228522/2015-5/Guangdong	Guangdong	2702	0	1
KC282632/2010-2/Guangdong	Guangdong	0	0	1
KC415258/2011-2/Fujian	Fujian	0	0	1
JN885609/2010-7/Guangdong	Guangdong	2705	0	1
KR018756/2011-2/Guangdong	Guangdong	2705	1	0
JN885617/2010-6/Guangdong	Guangdong	2705	1	0
KC282633/2010-2/Guangdong	Guangdong	2705	1	0
KM453698/2014-2/Jiangsu	Jiangsu	2708	1	0
KT961401/2014-2/Jiangsu	Jiangsu	2708	0	1
EU480716/2009-3/Jiangsu	Jiangsu	0	0	1
FJ765744/2008-9/Shandong	Shandong	2720	0	1
GQ222229/2008-2/Shandong	Shandong	2720	1	0
GQ857656/2014-6/Shandong	Shandong	2720	1	0
JN885622/2010-11/Guangdong	Guangdong	0	0	1
JQ798285/2012-2/Zhejiang	Zhejiang	0	0	1
GQ466013/2008-5/Shandong	Shandong	0	0	1
HQ832212/2010-2/Jiangxi	Jiangxi	2725	0	1
HQ832213/2010-2/Jiangxi	Jiangxi	2725	1	0
KC415256/2011-2/Fujian	Fujian	0	0	1
GQ466012/2008-5/Shandong	Shandong	0	0	1
JF906867/2008-7/Guangxi	Guangxi	2727	0	1
JX046319/2009-1/Guangxi	Guangxi	2727	1	0
JX046320/2009-1/Guangxi	Guangxi	2727	1	0
HQ832107/2008-1/Zhejiang	Zhejiang	0	0	1
GuangdongFoshanShanshui3_2010_06_24_China_zhanglab/2010-6/Guangdong	Guangdong	0	0	1
JQ663545/2010-2/Beijing	Beijing	0	0	1
JQ663555/2010-2/Shandong	Shandong	0	0	1
KC415261/2011-2/Fujian	Fujian	2731	0	1
KF562277/2009-11/Fujian	Fujian	2731	1	0
HQ832112/2009-1/Anhui	Anhui	0	0	1
HQ832165/2009-1/Hubei	Hubei	0	0	1
JF268672/2009-8/Sichuan	Sichuan	0	0	1
KR018780/2014-1/Guangdong	Guangdong	0	0	1
GQ122382/2009-2/Fujian	Fujian	0	0	1
GuangdongFoshanShanshui-821_2010_09_06_China_zhanglab/2010-9/Guangdong	Guangdong	0	0	1
GuangdongFoshan_2010_06_25_China_zhanglab/2010-6/Guangdong	Guangdong	0	0	1
HQ832219/2010-2/Hubei	Hubei	0	0	1
KC282629/2010-2/Guangdong	Guangdong	0	0	1
HQ832110/2009-1/Anhui	Anhui	0	0	1
KP771770/2012-9/Hunan	Hunan	0	0	1
KP771771/2012-9/Henan	Henan	0	0	1
HQ832205/2010-2/Hubei	Hubei	0	0	1
JQ798272/2011-2/Zhejiang	Zhejiang	2745	0	1
JQ798273/2011-2/Zhejiang	Zhejiang	2745	1	0
KC415260/2011-2/Fujian	Fujian	0	0	1
HQ832126/2009-1/Anhui	Anhui	0	0	1
HQ832255/2010-2/Shandong	Shandong	0	0	1
KF562292/2010-3/Jiangsu	Jiangsu	0	0	1
JF920780/2008-1/Yunnan	Yunnan	2751	0	1
JF920782/2008-1/Yunnan	Yunnan	2751	1	0
JN410840/2010-2/Hebei	Hebei	0	0	1
HQ832218/2010-2/Hubei	Hubei	0	0	1
KF562281/2009-4/Jiangsu	Jiangsu	0	0	1
GU902195/2009-11/Henan	Henan	0	0	1
JN885620/2010-7/Guangdong	Guangdong	2756	1	0
JN885625/2010-11/Guangdong	Guangdong	2756	1	0
KR018747/2011-3/Guangdong	Guangdong	2756	0	1
JN885631/2010-11/Guangdong	Guangdong	2756	1	0
JN885630/2010-11/Guangdong	Guangdong	2756	1	0
JN885626/2010-11/Guangdong	Guangdong	2756	1	0
JN885621/2010-9/Guangdong	Guangdong	2756	1	0
JN885623/2010-11/Guangdong	Guangdong	2756	1	0
JN885624/2010-11/Guangdong	Guangdong	2756	1	0
JQ828967/2009-1/Guangdong	Guangdong	0	0	1
GU977232/2009-10/Shandong	Shandong	0	0	1
KM453699/2014-2/Jiangsu	Jiangsu	0	0	1
HQ832153/2009-1/Hubei	Hubei	0	0	1
HQ832226/2010-2/Hubei	Hubei	0	0	1
HQ832227/2010-2/Hunan	Hunan	2772	1	0
HQ832228/2010-2/Hunan	Hunan	2772	0	1
KF562269/2008-10/Anhui	Anhui	0	0	1
JX192639/2010-1/Guangdong	Guangdong	0	0	1
KX228532/2014-3/Guangdong	Guangdong	0	0	1
HQ832241/2010-2/Jiangxi	Jiangxi	2773	0	1
HQ832242/2010-2/Jiangxi	Jiangxi	2773	1	0
FJ895329/2009-2/Beijing	Beijing	0	0	1
JQ663558/2010-2/Guangxi	Guangxi	0	0	1
KT961420/2014-9/Fujian	Fujian	0	0	1
KT961414/2015-4/Guangdong	Guangdong	0	0	1
KT961384/2014-6/Zhejiang	Zhejiang	0	0	1
JQ798267/2010-2/Zhejiang	Zhejiang	0	0	1
GU977231/2009-11/Shandong	Shandong	0	0	1
JN642705/2010-2/Jiangxi	Jiangxi	0	0	1
KP179230/2014-11/Hebei	Hebei	0	0	1
HQ191497/2010-5/Guangxi	Guangxi	0	0	1
HM101467/2009-8/Sichuan	Sichuan	0	0	1
KX228521/2014-6/Guangdong	Guangdong	0	0	1
KT961386/2015-3/Jiangsu	Jiangsu	0	0	1
KU201579/2008-1/Qinghai	Qinghai	0	0	1
JN885595/2008-6/Guangdong	Guangdong	0	0	1
FJ800806/2009-6/Tianjin	Tianjin	0	0	1
EU213103/2009-3/Guangxi	Guangxi	0	0	1
HQ832131/2009-1/Henan	Henan	2783	1	0
HQ832132/2009-1/Henan	Henan	2783	0	1
HQ832133/2009-1/Henan	Henan	2783	1	0
FJ883551/2008-5/Anhui	Anhui	0	0	1
GQ466015/2008-5/Shandong	Shandong	0	0	1
HQ315836/2008-1/Jiangsu	Jiangsu	2793	0	1
KJ523895/2009-6/Jiangsu	Jiangsu	2793	1	0
KJ523896/2010-2/Jiangsu	Jiangsu	2793	1	0
KJ523897/2011-12/Jiangsu	Jiangsu	2793	1	0
JQ828968/2009-1/Guangdong	Guangdong	0	0	1
HQ832142/2009-1/Hubei	Hubei	0	0	1
JF268674/2009-8/Hunan	Hunan	0	0	1
HM189676/2009-5/Heilongjiang	Heilongjiang	0	0	1
HM232841/2015-8/Heilongjiang	Heilongjiang	0	0	1
JF268677/2009-9/Beijing	Beijing	0	0	1
JF268681/2009-9/Beijing	Beijing	0	0	1
JF906881/2008-5/Guangxi	Guangxi	0	0	1
JQ663554/2012-7/Jilin	Jilin	0	0	1
HM213888/2009-1/Guangdong	Guangdong	2803	0	1
HM213889/2009-1/Guangdong	Guangdong	2803	1	0
KY620017/2015-3/Sichuan	Sichuan	0	0	1
KP771744/2013-9/Hebei	Hebei	2804	1	0
KP771745/2013-9/Hebei	Hebei	2804	0	1
JN543521/2014-8/Zhejiang	Zhejiang	0	0	1
EU480715/2009-3/Jiangxi	Jiangxi	0	0	1
JN543527/2014-8/Zhejiang	Zhejiang	0	0	1
FJ919331/2008-10/Chongqing	Chongqing	0	0	1
GU980186/2007-8/Guangdong	Guangdong	0	0	1
KF751237/2011-10/Beijing	Beijing	0	0	1
EU480712/2009-3/Zhejiang	Zhejiang	0	0	1
EU864231/2007-9/Guangdong	Guangdong	0	0	1
GU168567/2009-3/Hubei	Hubei	0	0	1
HQ832129/2009-1/Guangxi	Guangxi	0	0	1
HM213866/2008-5/Guangdong	Guangdong	2818	0	1
HM213867/2008-5/Guangdong	Guangdong	2818	1	0
HQ832117/2009-1/Anhui	Anhui	0	0	1
JX192632/2010-7/Guangdong	Guangdong	0	0	1
HQ832121/2009-1/Anhui	Anhui	0	0	1
JN543511/2014-8/Zhejiang	Zhejiang	0	0	1
JX046302/2009-1/Guangxi	Guangxi	0	0	1
GU454850/2007-8/Guangdong	Guangdong	2823	1	0
JQ828962/2009-1/Guangdong	Guangdong	2823	0	1
JF906886/2009-5/Guangxi	Guangxi	0	0	1
KR612111/2008-8/Guangdong	Guangdong	0	0	1
FJ712033/2009-3/Anhui	Anhui	0	0	1
EU709841/2007-12/Xinjiang	Xinjiang	0	0	1
EF990731/2007-3/Shandong	Shandong	0	0	1
HQ843179/2009-4/Beijing	Beijing	0	0	1
HQ843180/2009-4/Shandong	Shandong	0	0	1
EU200954/2007-3/Sichuan	Sichuan	0	0	1
EU600287/2007-10/Ningxia	Ningxia	0	0	1
EU600288/2007-10/Ningxia	Ningxia	0	0	1
JN984926/2007-8/Ningxia	Ningxia	0	0	1
JN994595/2009-1/Gansu	Gansu	0	0	1
JN968970/2015-9/Gansu	Gansu	0	0	1
JN994594/2009-1/Ningxia	Ningxia	0	0	1
EU600290/2008-3/Gansu	Gansu	0	0	1
JQ002679/2007-5/Gansu	Gansu	0	0	1
JQ007310/2010-2/Guangxi	Guangxi	0	0	1
JQ011372/2007-5/Gansu	Gansu	2844	0	1
JQ011374/2009-1/Gansu	Gansu	2844	1	0
GQ128443/2007-7/Anhui	Anhui	2845	0	1
GQ243423/2008-5/Anhui	Anhui	2845	1	0
GQ243425/2008-5/Anhui	Anhui	2845	1	0
GQ243424/2008-5/Anhui	Anhui	2845	1	0
JF268676/2009-10/Beijing	Beijing	0	0	1
JF268679/2009-10/Hebei	Hebei	0	0	1
JF268678/2009-8/Shandong	Shandong	0	0	1
GU474514/2008-12/Hebei	Hebei	0	0	1
EU399870/2011-2/Anhui	Anhui	0	0	1
EU213105/2009-3/Guangxi	Guangxi	2851	1	0
HM232845/2015-8/Guangxi	Guangxi	2851	0	1
HM232846/2015-8/Guangxi	Guangxi	2851	1	0
FJ237431/2008-2/Henan	Henan	0	0	1
JN543532/2015-9/Zhejiang	Zhejiang	0	0	1
FJ712032/2009-3/Anhui	Anhui	0	0	1
GQ466006/2008-5/Shandong	Shandong	0	0	1
EU399868/2011-2/Jiangxi	Jiangxi	0	0	1
JF268673/2009-8/Hunan	Hunan	0	0	1
JN885603/2009-1/Guangdong	Guangdong	0	0	1
JF906888/2008-5/Guangxi	Guangxi	0	0	1
KT030964/2012-2/Sichuan	Sichuan	0	0	1
GU980176/2007-5/Guangdong	Guangdong	0	0	1
JX046295/2007-5/Guangxi	Guangxi	2864	0	1
JX046297/2007-5/Guangxi	Guangxi	2864	1	0
KP771779/2008-1/Beijing	Beijing	0	0	1
FJ800779/2007-6/Hainan	Hainan	0	0	1
FJ800801/2007-6/Ningxia	Ningxia	0	0	1
HM232836/2014-8/InnerMongolia	InnerMongolia	0	0	1
HM232848/2015-8/Anhui	Anhui	0	0	1
HM232843/2015-8/Heilongjiang	Heilongjiang	0	0	1
EU371954/2011-2/Hunan	Hunan	0	0	1
FJ800795/2009-6/Hubei	Hubei	0	0	1
HQ832135/2009-1/Hubei	Hubei	2871	1	0
HQ832136/2009-1/Hubei	Hubei	2871	1	0
HQ832140/2009-1/Hubei	Hubei	2871	1	0
HQ832137/2009-1/Hubei	Hubei	2871	0	1
HQ832139/2009-1/Hubei	Hubei	2871	1	0
HQ832138/2009-1/Hubei	Hubei	2871	1	0
EF990729/2007-3/Shandong	Shandong	0	0	1
EF990732/2007-3/Jiangsu	Jiangsu	0	0	1
FJ800750/2010-6/Anhui	Anhui	0	0	1
HM232844/2015-8/Heilongjiang	Heilongjiang	0	0	1
KR612110/2008-8/Guangdong	Guangdong	0	0	1
JN543510/2015-8/Zhejiang	Zhejiang	2881	0	1
JQ798265/2010-2/Zhejiang	Zhejiang	2881	1	0
EU144079/2016-1/Jiangsu	Jiangsu	0	0	1
GU980185/2007-3/Guangdong	Guangdong	0	0	1
JX046266/2006-8/Guangxi	Guangxi	0	0	1
FJ800767/2009-6/Chongqing	Chongqing	0	0	1
JX046271/2007-5/Guangxi	Guangxi	2888	0	1
JX046280/2006-8/Guangxi	Guangxi	2888	1	0
EU200962/2016-1/Jiangxi	Jiangxi	0	0	1
EU213099/2009-3/Guangdong	Guangdong	0	0	1
HQ191494/2009-12/Guangxi	Guangxi	0	0	1
JN543515/2013-8/Zhejiang	Zhejiang	0	0	1
HQ832164/2009-1/Hubei	Hubei	0	0	1
JN836553/2009-5/Sichuan	Sichuan	0	0	1
FJ394029/2008-3/Beijing	Beijing	0	0	1
HQ832193/2010-2/Henan	Henan	2897	0	1
HQ832194/2010-2/Henan	Henan	2897	1	0
HQ832222/2010-2/Zhejiang	Zhejiang	2898	1	0
HQ832223/2010-2/Zhejiang	Zhejiang	2898	0	1
HQ832224/2010-2/Zhejiang	Zhejiang	2898	1	0
EU213107/2009-3/Guangxi	Guangxi	0	0	1
GU980175/2007-5/Guangdong	Guangdong	0	0	1
EU213144/2009-3/Yunnan	Yunnan	0	0	1
HQ832143/2009-1/Hubei	Hubei	0	0	1
JN642708/2010-2/Guangdong	Guangdong	0	0	1
GuangdongFoshanShanshui1_2010_China_zhanglab/2010-1/Guangdong	Guangdong	0	0	1
GQ466007/2008-5/Shandong	Shandong	0	0	1
FJ361883/2007-8/Yunnan	Yunnan	2912	0	1
JF920774/2008-1/Yunnan	Yunnan	2912	1	0
FJ361884/2007-8/Yunnan	Yunnan	2912	1	0
JX046299/2009-1/Guangxi	Guangxi	2914	1	0
JX046300/2009-1/Guangxi	Guangxi	2914	0	1
JX046301/2009-1/Guangxi	Guangxi	2914	1	0
JQ828959/2009-1/Guangdong	Guangdong	0	0	1
HQ832210/2010-2/Jiangxi	Jiangxi	0	0	1
KP771747/2012-9/Chongqing	Chongqing	0	0	1
FJ800765/2009-6/Chongqing	Chongqing	0	0	1
FJ919342/2008-10/Chongqing	Chongqing	0	0	1
HQ832127/2009-1/Fujian	Fujian	0	0	1
EU709843/2006-7/Zhejiang	Zhejiang	0	0	1
GU980178/2007-3/Guangdong	Guangdong	0	0	1
KM377849/2014-1/Fujian	Fujian	0	0	1
KX228526/2016-3/Guangdong	Guangdong	0	0	1
EF990730/2007-3/Jiangsu	Jiangsu	0	0	1
EU213147/2009-3/Zhejiang	Zhejiang	0	0	1
JN256115/2014-8/Shandong	Shandong	0	0	1
KM377848/2014-6/Fujian	Fujian	0	0	1
KT208316/2015-11/Guangxi	Guangxi	0	0	1
JQ798263/2010-2/Zhejiang	Zhejiang	0	0	1
MF095231/2014-9/Heilongjiang	Heilongjiang	0	0	1
KY798939/2015-12/Fujian	Fujian	0	0	1
KC454379/2012-9/Heilongjiang	Heilongjiang	2932	0	1
KC454383/2012-9/Heilongjiang	Heilongjiang	2932	1	0
KC454387/2011-2/Heilongjiang	Heilongjiang	2932	1	0
KC454382/2011-2/Heilongjiang	Heilongjiang	2932	1	0
JN543528/2014-8/Zhejiang	Zhejiang	0	0	1
MN660067/2013-9/Guangxi	Guangxi	2935	1	0
MN660068/2013-9/Guangxi	Guangxi	2935	0	1
FJ889129/2008-10/Chongqing	Chongqing	0	0	1
FJ800783/2010-6/Hubei	Hubei	0	0	1
HQ843178/2009-4/Heilongjiang	Heilongjiang	0	0	1
JF906873/2008-5/Guangxi	Guangxi	0	0	1
JN543531/2014-8/Zhejiang	Zhejiang	0	0	1
EU480744/2009-3/Zhejiang	Zhejiang	0	0	1
HQ315837/2009-9/Beijing	Beijing	0	0	1
JF906868/2009-4/Guangxi	Guangxi	2943	1	0
JF906887/2009-6/Guangxi	Guangxi	2943	0	1
JN968969/2015-9/Gansu	Gansu	2944	1	0
JN994592/2008-1/Gansu	Gansu	2944	1	0
JN994596/2010-2/Gansu	Gansu	2944	0	1
FJ237427/2008-1/Henan	Henan	2946	1	0
FJ237432/2008-5/Henan	Henan	2946	0	1
EF471929/2006-11/Hunan	Hunan	0	0	1
EU825724/2007-4/Guangdong	Guangdong	0	0	1
GDZJ_96_Guang_dong_Zhan_jiang_20220107_China_zhanglab/2022-1/Guangdong	Guangdong	0	0	1
KC415257/2011-2/Fujian	Fujian	0	0	1
GU143913/2009-2/Guangdong	Guangdong	0	0	1
KY508618/2016-10/Guangdong	Guangdong	0	0	1
JX046251/2006-8/Guangxi	Guangxi	0	0	1
GU980180/2007-5/Guangdong	Guangdong	0	0	1
JQ828954/2008-1/Guangdong	Guangdong	0	0	1
MK943930/2015-10/Hubei	Hubei	2965	0	1
MK943931/2015-10/Hubei	Hubei	2965	1	0
MK943932/2015-10/Hubei	Hubei	2965	1	0
KP771776/2012-9/Chongqing	Chongqing	0	0	1
GU980162/2007-5/Guangdong	Guangdong	0	0	1
HM213872/2008-5/Guangdong	Guangdong	2967	0	1
HM213873/2008-5/Guangdong	Guangdong	2967	1	0
HM213874/2008-5/Guangdong	Guangdong	2967	1	0
HQ832128/2009-1/Guangxi	Guangxi	0	0	1
KR080341/2015-2/Xinjiang	Xinjiang	0	0	1
KJ819936/2014-4/Henan	Henan	0	0	1
GU980161/2007-7/Guangdong	Guangdong	0	0	1
KY620024/2016-2/Sichuan	Sichuan	0	0	1
GuangdongShenzhen-W3_2010_08_11_China_zhanglab/2010-8/Guangdong	Guangdong	0	0	1
HM214914/2014-6/Guangxi	Guangxi	2975	1	0
HQ191491/2009-2/Guangxi	Guangxi	2975	1	0
JX046261/2008-1/Guangxi	Guangxi	2975	1	0
KC618109/2011-2/Guangxi	Guangxi	2975	0	1
KC618123/2011-5/Guangxi	Guangxi	2975	1	0
YX-GP5_Fujian_20141014_China_zhanglab/2014-10/Fujian	Fujian	0	0	1
EU213109/2009-3/Guangxi	Guangxi	0	0	1
EU428818/2008-3/Guangxi	Guangxi	2980	1	0
EU428820/2008-3/Guangxi	Guangxi	2980	1	0
EU562181/2008-3/Guangxi	Guangxi	2980	0	1
FJ889130/2008-8/Chongqing	Chongqing	0	0	1
JN885601/2008-1/Guangdong	Guangdong	2983	1	0
KR612150/2012-3/Guangdong	Guangdong	2983	0	1
EU213130/2009-3/Hunan	Hunan	2984	0	1
EU213134/2009-3/Hunan	Hunan	2984	1	0
EU213110/2009-3/Guangxi	Guangxi	0	0	1
EU213104/2009-3/Guangxi	Guangxi	0	0	1
JQ828950/2008-1/Guangdong	Guangdong	0	0	1
13GZLZ-GP5_Guangdong_Zhongshan_2013_China_zhanglab/2013-5/Guangdong	Guangdong	0	0	1
JX876924/2011-2/Heilongjiang	Heilongjiang	0	0	1
MK943888/2016-10/Hubei	Hubei	0	0	1
KU898919/2014-12/Guangxi	Guangxi	0	0	1
JN387273/2010-11/Guangdong	Guangdong	0	0	1
GDTSWHgp5_Guang_dong_Jiang_men_20160229_China_zhanglab/2016-2/Guangdong	Guangdong	0	0	1
KM233873/2013-9/Shaanxi	Shaanxi	0	0	1
JX878379/2011-8/Shandong	Shandong	2355	0	1
JX878380/2011-8/Shandong	Shandong	2355	1	0
MT416545/2018-11/Fujian	Fujian	0	0	1
KF416330/2013-9/Henan	Henan	0	0	1
MN306074/2016-11/Shandong	Shandong	0	0	1
JX876921/2011-2/Heilongjiang	Heilongjiang	0	0	1
KM000066/2014-4/InnerMongolia	InnerMongolia	0	0	1
KP771784/2014-9/Shandong	Shandong	0	0	1
KY508641/2016-11/Yunnan	Yunnan	0	0	1
MF095246/2015-11/Jilin	Jilin	0	0	1
KP814043/2013-5/Shandong	Shandong	0	0	1
KR080331/2015-2/Xinjiang	Xinjiang	2376	0	1
KR080333/2015-2/Xinjiang	Xinjiang	2376	1	0
KR080337/2015-2/Xinjiang	Xinjiang	2376	1	0
MF095212/2013-9/Heilongjiang	Heilongjiang	0	0	1
MF095245/2015-11/Heilongjiang	Heilongjiang	0	0	1
MF095218/2013-9/Hebei	Hebei	0	0	1
KJ002451/2013-6/Henan	Henan	0	0	1
KT208337/2015-11/Fujian	Fujian	0	0	1
KX077653/2014-9/Guangxi	Guangxi	0	0	1
KY620016/2015-2/Sichuan	Sichuan	0	0	1
KY508620/2016-7/Guangdong	Guangdong	0	0	1
KJ854750/2012-9/Yunnan	Yunnan	0	0	1
KJ002452/2013-9/Henan	Henan	0	0	1
MT811837/2017-2/Yunnan	Yunnan	0	0	1
KT351739/2013-11/Heilongjiang	Heilongjiang	0	0	1
KJ819935/2014-4/Henan	Henan	0	0	1
MF095211/2013-9/Heilongjiang	Heilongjiang	2384	0	1
MF095214/2013-9/Heilongjiang	Heilongjiang	2384	1	0
KJ854747/2012-9/Yunnan	Yunnan	0	0	1
KJ854751/2012-9/Yunnan	Yunnan	0	0	1
KT208344/2014-9/Guangdong	Guangdong	0	0	1
MF095213/2013-9/Heilongjiang	Heilongjiang	0	0	1
KJ546412/2013-7/Henan	Henan	0	0	1
KJ609517/2013-7/Heilongjiang	Heilongjiang	0	0	1
KT030993/2014-11/Sichuan	Sichuan	2389	1	0
KT030995/2014-12/Sichuan	Sichuan	2389	1	0
KT030996/2014-6/Sichuan	Sichuan	2389	1	0
KY620018/2015-10/Sichuan	Sichuan	2389	0	1
KM233868/2013-9/Shaanxi	Shaanxi	0	0	1
MF095209/2014-9/Liaoning	Liaoning	0	0	1
JN387272/2010-7/Guangdong	Guangdong	2394	1	0
JN387274/2011-2/Guangdong	Guangdong	2394	0	1
KJ534541/2013-6/Henan	Henan	2395	0	1
KY290748/2016-3/Henan	Henan	2395	1	0
KR902960/2014-12/Henan	Henan	0	0	1
MF095208/2014-9/Liaoning	Liaoning	0	0	1
MF095237/2014-9/Beijing	Beijing	0	0	1
FJ-2016-0413_Fujian_2016_China_zhanglab/2016-4/Fujian	Fujian	2398	0	1
KT208319/2015-11/Fujian	Fujian	2398	1	0
KT208342/2014-9/Guangdong	Guangdong	2401	0	1
KY508637/2016-7/Guangdong	Guangdong	2401	1	0
MK943891/2016-10/Hubei	Hubei	0	0	1
KT424225/2014-9/Henan	Henan	0	0	1
EF398051/2007-3/Hainan	Hainan	0	0	1
EU709821/2007-11/Jiangsu	Jiangsu	2411	1	0
EU709840/2007-8/Jiangsu	Jiangsu	2411	1	0
EU709822/2007-12/Jiangsu	Jiangsu	2411	0	1
EU709836/2007-12/Jiangsu	Jiangsu	2411	1	0
EU709838/2007-8/Jiangsu	Jiangsu	2411	1	0
EU709824/2007-6/Jiangsu	Jiangsu	2411	1	0
EU709826/2006-9/Jiangsu	Jiangsu	2411	1	0
EU709835/2002-12/Jiangsu	Jiangsu	2411	1	0
EU709829/2007-11/Jiangsu	Jiangsu	2411	1	0
GQ466011/2008-5/Shandong	Shandong	0	0	1
KT961411/2014-12/Henan	Henan	0	0	1
JX046265/2006-8/Guangxi	Guangxi	0	0	1
JX046311/2008-1/Guangxi	Guangxi	0	0	1
KC454375/2011-2/Anhui	Anhui	0	0	1
KY798935/2015-12/Fujian	Fujian	0	0	1
KC454377/2010-2/Heilongjiang	Heilongjiang	0	0	1
JF906874/2008-12/Guangxi	Guangxi	0	0	1
KY620021/2015-1/Sichuan	Sichuan	2423	0	1
KY620022/2015-5/Sichuan	Sichuan	2423	1	0
KC454388/2010-2/Henan	Henan	0	0	1
KT961398/2014-5/Jiangsu	Jiangsu	0	0	1
EU152109/2007-7/Shanghai	Shanghai	0	0	1
EU595692/2008-3/Zhejiang	Zhejiang	0	0	1
KR080335/2015-2/Xinjiang	Xinjiang	0	0	1
KR018786/2014-11/Guangdong	Guangdong	2434	1	0
KR612174/2015-2/Guangdong	Guangdong	2434	1	0
KR612163/2015-1/Guangdong	Guangdong	2434	0	1
MK943921/2012-10/Henan	Henan	0	0	1
EU480720/2009-3/Zhejiang	Zhejiang	0	0	1
KP771757/2012-9/Beijing	Beijing	0	0	1
FJ800785/2009-6/Hubei	Hubei	0	0	1
GQ466016/2008-5/Shandong	Shandong	0	0	1
GQ466008/2008-5/Shandong	Shandong	0	0	1
HM232847/2015-8/Heilongjiang	Heilongjiang	0	0	1
HM232832/2014-6/Shandong	Shandong	0	0	1
HM232835/2014-6/InnerMongolia	InnerMongolia	0	0	1
HM232833/2014-6/Heilongjiang	Heilongjiang	2444	0	1
HM232834/2014-6/Heilongjiang	Heilongjiang	2444	1	0
GuangdongZhaoqing-4_2010_08_27_China_zhanglab/2010-8/Guangdong	Guangdong	0	0	1
JF906863/2009-1/Guangxi	Guangxi	0	0	1
EU399865/2011-2/Anhui	Anhui	0	0	1
EU709823/2007-8/Jiangsu	Jiangsu	2447	1	0
EU709847/2007-9/Jiangsu	Jiangsu	2447	0	1
JQ828957/2008-1/Guangdong	Guangdong	2448	0	1
JQ828972/2009-1/Guangdong	Guangdong	2448	1	0
KP771758/2012-9/Beijing	Beijing	0	0	1
GuangdongZhaoqingSihui_2010_06_25_China_zhanglab/2010-6/Guangdong	Guangdong	0	0	1
JX046306/2009-1/Guangxi	Guangxi	0	0	1
HQ832208/2010-2/Jiangxi	Jiangxi	2452	0	1
HQ832215/2010-2/Jiangxi	Jiangxi	2452	1	0
HQ832217/2010-2/Jiangxi	Jiangxi	2452	1	0
HQ832209/2010-2/Jiangxi	Jiangxi	2452	1	0
HQ832214/2010-2/Jiangxi	Jiangxi	2452	1	0
JX046267/2007-5/Guangxi	Guangxi	0	0	1
EU106888/2007-3/Beijing	Beijing	0	0	1
EU213135/2009-3/Heilongjiang	Heilongjiang	0	0	1
JQ828963/2009-1/Guangdong	Guangdong	0	0	1
EU480724/2009-3/Zhejiang	Zhejiang	0	0	1
FJ800756/2004-6/Beijing	Beijing	2462	0	1
FJ800757/2006-6/Beijing	Beijing	2462	1	0
FJ800758/2007-6/Beijing	Beijing	2462	1	0
FJ800784/2007-6/Hubei	Hubei	0	0	1
FJ800804/2009-6/Shandong	Shandong	0	0	1
AB359237/2006-12/Anhui	Anhui	0	0	1
JF906885/2009-2/Guangxi	Guangxi	0	0	1
HM232838/2015-8/Heilongjiang	Heilongjiang	0	0	1
JF906861/2008-5/Guangxi	Guangxi	0	0	1
EU213095/2009-3/Guangdong	Guangdong	2024	0	1
EU213096/2009-3/Guangdong	Guangdong	2024	1	0
HM213900/2009-1/Guangdong	Guangdong	0	0	1
HM232840/2015-8/Hunan	Hunan	0	0	1
HQ191495/2010-3/Guangxi	Guangxi	0	0	1
JN642709/2010-2/Zhejiang	Zhejiang	2028	1	0
JQ798264/2010-2/Zhejiang	Zhejiang	2028	0	1
JX046272/2009-1/Guangxi	Guangxi	0	0	1
EF398046/2007-3/Jiangxi	Jiangxi	0	0	1
JX046292/2009-1/Guangxi	Guangxi	0	0	1
GZ3-GD-1022-GP5_Guangdong_20131022_China_zhanglab/2013-10/Guangdong	Guangdong	2031	1	0
JN885604/2009-2/Guangdong	Guangdong	2031	1	0
JN885605/2009-2/Guangdong	Guangdong	2031	0	1
KM377845/2014-6/Guangdong	Guangdong	2031	1	0
KX228531/2014-11/Guangdong	Guangdong	2031	1	0
EF471930/2006-12/Hunan	Hunan	0	0	1
EU480713/2009-3/Zhejiang	Zhejiang	0	0	1
HQ832161/2009-1/Jiangxi	Jiangxi	2039	0	1
HQ832162/2009-1/Jiangxi	Jiangxi	2039	1	0
HQ832163/2009-1/Jiangxi	Jiangxi	2039	1	0
EU213092/2009-3/Anhui	Anhui	0	0	1
EU595694/2008-3/Zhejiang	Zhejiang	0	0	1
HQ832192/2010-2/Hebei	Hebei	0	0	1
HQ832197/2010-2/Henan	Henan	0	0	1
HQ832198/2010-2/Henan	Henan	0	0	1
HM214913/2014-6/Guangxi	Guangxi	0	0	1
GQ241732/2008-6/Shaanxi	Shaanxi	0	0	1
JQ828970/2009-1/Guangdong	Guangdong	0	0	1
KR048684/2013-9/Fujian	Fujian	0	0	1
JN543513/2014-8/Zhejiang	Zhejiang	0	0	1
JN543526/2014-8/Zhejiang	Zhejiang	0	0	1
JN885628/2010-10/Guangdong	Guangdong	0	0	1
JX046249/2009-1/Guangxi	Guangxi	0	0	1
KT961397/2014-11/Jiangsu	Jiangsu	0	0	1
JX046298/2009-1/Guangxi	Guangxi	0	0	1
KX228518/2015-11/Guangdong	Guangdong	0	0	1
JX046291/2008-1/Guangxi	Guangxi	0	0	1
EU213101/2009-3/Guangxi	Guangxi	0	0	1
EU371944/2011-2/Hubei	Hubei	0	0	1
EU399866/2011-2/Jiangxi	Jiangxi	0	0	1
EU399854/2011-2/Anhui	Anhui	0	0	1
EU480710/2009-3/Zhejiang	Zhejiang	0	0	1
EU860249/2007-3/Jilin	Jilin	0	0	1
HM114311/2006-11/Fujian	Fujian	2061	0	1
HM070381/2006-11/Fujian	Fujian	2061	1	0
KP998479/2015-9/Fujian	Fujian	2061	1	0
EU880431/2016-1/Gansu	Gansu	0	0	1
EU880433/2016-1/Guangdong	Guangdong	0	0	1
EU880434/2016-1/Gansu	Gansu	2068	1	0
JQ007313/2008-1/Gansu	Gansu	2068	0	1
EU880435/2016-1/Gansu	Gansu	2068	1	0
EU880432/2016-1/Jiangxi	Jiangxi	0	0	1
EU880437/2016-1/Henan	Henan	0	0	1
JQ002677/2008-1/Gansu	Gansu	2070	0	1
JQ002678/2008-1/Gansu	Gansu	2070	1	0
JQ007309/2009-1/Gansu	Gansu	2070	1	0
AB359238/2007-12/Hubei	Hubei	0	0	1
EU595689/2008-3/Zhejiang	Zhejiang	0	0	1
MF095202/2006-8/Henan	Henan	0	0	1
EU399841/2011-2/Hubei	Hubei	0	0	1
EU399838/2011-2/Jiangxi	Jiangxi	1908	1	0
EU399839/2011-2/Jiangxi	Jiangxi	1908	0	1
MF095207/2006-8/Henan	Henan	0	0	1
EU399844/2011-2/Hubei	Hubei	0	0	1
EU399843/2011-2/Hubei	Hubei	0	0	1
MF095201/2006-8/Henan	Henan	1909	0	1
MF095205/2006-8/Henan	Henan	1909	1	0
EU086603/2007-3/Shandong	Shandong	0	0	1
EU480738/2009-3/Zhejiang	Zhejiang	0	0	1
EU148496/2007-3/Jiangsu	Jiangsu	0	0	1
EU148487/2007-3/Jiangsu	Jiangsu	0	0	1
EU480741/2009-3/Zhejiang	Zhejiang	0	0	1
FJ800759/2009-6/Beijing	Beijing	1919	1	0
GQ351601/2007-6/Beijing	Beijing	1919	0	1
EU399836/2011-2/Henan	Henan	0	0	1
HQ832093/2006-8/Hubei	Hubei	0	0	1
EU399837/2011-2/Henan	Henan	0	0	1
FJ800791/2009-6/Henan	Henan	0	0	1
FJ800751/2006-6/Beijing	Beijing	0	0	1
EU148492/2007-3/Jiangsu	Jiangsu	0	0	1
FJ237423/2007-11/Henan	Henan	0	0	1
MF095203/2006-8/Henan	Henan	0	0	1
EU399840/2011-2/Hubei	Hubei	1925	1	0
EU399842/2011-2/Hubei	Hubei	1925	0	1
FJ870109/2009-6/Hubei	Hubei	1928	1	0
FJ870110/2009-6/Hubei	Hubei	1928	1	0
FJ870113/2009-6/Hubei	Hubei	1928	0	1
MF095199/2006-8/Henan	Henan	0	0	1
MF095197/2006-8/Henan	Henan	0	0	1
MF095200/2006-8/Henan	Henan	0	0	1
AY032626/1996-5/Beijing	Beijing	0	0	1
EU807840/2016-1/Heilongjiang	Heilongjiang	0	0	1
KJ541663/2005-6/Guangdong	Guangdong	0	0	1
GQ184821/2008-5/Heilongjiang	Heilongjiang	1826	1	0
JX679179/2011-2/Heilongjiang	Heilongjiang	1826	0	1
KT961388/2015-7/Jiangxi	Jiangxi	0	0	1
MN119304/2016-12/Shandong	Shandong	0	0	1
KT208297/2014-9/Guangdong	Guangdong	0	0	1
MZ322956/2019-6/Shandong	Shandong	0	0	1
MT268944/2017-11/Sichuan	Sichuan	1830	1	0
MT268957/2016-12/Sichuan	Sichuan	1830	0	1
EU880438/2016-1/Gansu	Gansu	0	0	1
DQ120518/2006-4/Hubei	Hubei	0	0	1
JQ798258/2010-2/Zhejiang	Zhejiang	0	0	1
KC618050/2012-11/Guangxi	Guangxi	0	0	1
FJ237424/2007-11/Henan	Henan	0	0	1
KJ609516/2013-7/Heilongjiang	Heilongjiang	0	0	1
KJ819934/2014-4/Henan	Henan	0	0	1
EU399828/2011-2/Anhui	Anhui	1833	1	0
EU399830/2011-2/Anhui	Anhui	1833	0	1
EU399829/2011-2/Anhui	Anhui	0	0	1
JN543525/2014-8/Zhejiang	Zhejiang	0	0	1
AY747595/2004-4/Guangdong	Guangdong	1841	0	1
AY857635/2005-4/Guangdong	Guangdong	1841	1	0
AY858586/2005-4/Guangdong	Guangdong	1841	1	0
KC454393/2008-1/Shandong	Shandong	0	0	1
KY798920/2016-12/Fujian	Fujian	0	0	1
EU480730/2009-3/Zhejiang	Zhejiang	0	0	1
FJ237428/2008-1/Henan	Henan	0	0	1
AY857636/2005-4/Guangdong	Guangdong	0	0	1
EU399831/2011-2/Hubei	Hubei	0	0	1
EU399834/2011-2/Jiangxi	Jiangxi	0	0	1
EU399835/2011-2/Anhui	Anhui	0	0	1
EU399833/2011-2/Hubei	Hubei	0	0	1
EU480742/2009-3/Zhejiang	Zhejiang	0	0	1
EU480734/2009-3/Jiangxi	Jiangxi	0	0	1
EU595693/2008-3/Zhejiang	Zhejiang	0	0	1
JF906860/2008-12/Guangxi	Guangxi	1809	0	1
JF906875/2008-7/Guangxi	Guangxi	1809	1	0
JF906865/2008-12/Guangxi	Guangxi	1809	1	0
KT208300/2014-9/Guangdong	Guangdong	0	0	1
NP-2-GP5_Fujian_Nanping_20141014_China_zhanglab/2014-10/Fujian	Fujian	0	0	1
EU819086/2008-4/Yunnan	Yunnan	1784	1	0
JF920763/2008-1/Yunnan	Yunnan	1784	1	0
JF920789/2009-1/Yunnan	Yunnan	1784	1	0
JF920790/2009-1/Yunnan	Yunnan	1784	1	0
JF920801/2009-1/Yunnan	Yunnan	1784	1	0
JF920793/2009-1/Yunnan	Yunnan	1784	1	0
JF920791/2009-1/Yunnan	Yunnan	1784	1	0
JF920794/2009-1/Yunnan	Yunnan	1784	1	0
JF920795/2009-1/Yunnan	Yunnan	1784	1	0
JF920764/2008-1/Yunnan	Yunnan	1784	1	0
JF920779/2008-1/Yunnan	Yunnan	1784	1	0
JF920786/2009-1/Yunnan	Yunnan	1784	1	0
JF920788/2009-1/Yunnan	Yunnan	1784	0	1
FJ361887/2007-11/Yunnan	Yunnan	1784	1	0
MT811832/2017-10/Yunnan	Yunnan	1784	1	0
MT811835/2018-9/Yunnan	Yunnan	1784	1	0
KJ747052/2011-2/Yunnan	Yunnan	1784	1	0
HQ233605/2002-8/Hubei	Hubei	0	0	1
KF751238/2011-10/Liaoning	Liaoning	0	0	1
MF095228/2014-9/Heilongjiang	Heilongjiang	0	0	1
KC415264/2009-1/Fujian	Fujian	0	0	1
KC454391/2008-1/Shandong	Shandong	0	0	1
JX046253/2004-8/Guangxi	Guangxi	0	0	1
AY450301/2006-4/Zhejiang	Zhejiang	0	0	1
KC454392/2009-1/Shandong	Shandong	0	0	1
KY798934/2015-12/Fujian	Fujian	0	0	1
EU480733/2009-3/Jiangxi	Jiangxi	0	0	1
JF906882/2008-11/Guangxi	Guangxi	0	0	1
EU148491/2007-3/Jiangsu	Jiangsu	0	0	1
JN543534/2015-9/Zhejiang	Zhejiang	0	0	1
EU371943/2011-2/Hubei	Hubei	0	0	1
JX046304/2009-1/Guangxi	Guangxi	1859	1	0
JX046305/2009-1/Guangxi	Guangxi	1859	0	1
FJ800755/2008-6/Beijing	Beijing	0	0	1
JX046254/2004-8/Guangxi	Guangxi	0	0	1
AY633974/2004-4/Zhejiang	Zhejiang	0	0	1
EU148493/2007-3/Jiangsu	Jiangsu	0	0	1
EU480732/2009-3/Jiangxi	Jiangxi	0	0	1
EU480736/2009-3/Zhejiang	Zhejiang	0	0	1
EU480729/2009-3/Zhejiang	Zhejiang	0	0	1
EU480735/2009-3/Zhejiang	Zhejiang	0	0	1
KP998475/2015-9/Fujian	Fujian	0	0	1
EF104600/2006-4/Guangxi	Guangxi	0	0	1
EU022749/2007-3/Hebei	Hebei	0	0	1
EU480727/2009-3/Zhejiang	Zhejiang	0	0	1
EU480739/2009-3/Zhejiang	Zhejiang	0	0	1
EU480731/2009-3/Zhejiang	Zhejiang	0	0	1
EU864232/2005-1/Guangdong	Guangdong	1873	1	0
HM213884/2009-1/Guangdong	Guangdong	1873	1	0
KR612172/2015-2/Guangdong	Guangdong	1873	1	0
KR612178/2015-3/Guangdong	Guangdong	1873	1	0
KU997073/2015-8/Guangdong	Guangdong	1873	1	0
KR018797/2013-7/Guangdong	Guangdong	1873	0	1
KU997074/2015-8/Guangdong	Guangdong	1873	1	0
KR018755/2012-10/Guangdong	Guangdong	1873	1	0
KR018766/2013-3/Guangdong	Guangdong	1873	1	0
KR612173/2015-2/Guangdong	Guangdong	1873	1	0
JX046269/2004-8/Guangxi	Guangxi	0	0	1
AY858585/2005-4/Guangdong	Guangdong	1884	1	0
GU269541/2005-12/Guangdong	Guangdong	1884	0	1
EF153485/2006-4/Jilin	Jilin	0	0	1
FJ800800/2007-6/Liaoning	Liaoning	0	0	1
JX046270/2006-8/Guangxi	Guangxi	0	0	1
JX046293/2004-8/Guangxi	Guangxi	0	0	1
EU148488/2007-3/Zhejiang	Zhejiang	0	0	1
EU148489/2007-3/Jiangsu	Jiangsu	1892	1	0
EU148495/2007-3/Jiangsu	Jiangsu	1892	0	1
EU480745/2009-3/Zhejiang	Zhejiang	0	0	1
EU148490/2007-3/Jiangsu	Jiangsu	0	0	1
EU148494/2007-3/Jiangsu	Jiangsu	0	0	1
EU480737/2009-3/Zhejiang	Zhejiang	0	0	1
AY857637/2005-4/Guangdong	Guangdong	0	0	1
JX046309/2009-1/Guangxi	Guangxi	1935	1	0
JX046310/2009-1/Guangxi	Guangxi	1935	0	1
JX046279/2005-8/Guangxi	Guangxi	0	0	1
FJ800780/2009-6/Hubei	Hubei	0	0	1
FJ237422/2007-11/Henan	Henan	1936	0	1
FJ556871/2009-3/Henan	Henan	1936	1	0
FJ237425/2008-1/Henan	Henan	0	0	1
JX046268/2008-1/Guangxi	Guangxi	0	0	1
KF768115/2013-9/Guangdong	Guangdong	1941	1	0
KF768125/2013-9/Guangdong	Guangdong	1941	1	0
MM-GD-1111-GP5_Guangdong_20131111_China_zhanglab/2013-11/Guangdong	Guangdong	1941	0	1
KT351740/2013-1/Heilongjiang	Heilongjiang	0	0	1
FJ-2016-0415_Fujian_2016_China_zhanglab/2016-4/Fujian	Fujian	0	0	1
EU399855/2011-2/Anhui	Anhui	0	0	1
EU399856/2011-2/Anhui	Anhui	0	0	1
EU399857/2011-2/Anhui	Anhui	0	0	1
EF432575/2016-1/Hebei	Hebei	1954	1	0
EU439252/2008-3/Hebei	Hebei	1954	0	1
EU399862/2011-2/Jiangxi	Jiangxi	0	0	1
EU399863/2011-2/Anhui	Anhui	0	0	1
EU399861/2011-2/Henan	Henan	0	0	1
EU075303/2007-3/Hebei	Hebei	1958	1	0
EU177106/2007-3/Hebei	Hebei	1958	1	0
EU177114/2007-3/Hebei	Hebei	1958	0	1
EU255925/2007-3/Hebei	Hebei	1958	1	0
EU366151/2008-3/Hebei	Hebei	1958	1	0
EU177120/2007-3/Hebei	Hebei	1958	1	0
EU660958/2008-3/Hebei	Hebei	1958	1	0
EU399864/2011-2/Anhui	Anhui	0	0	1
KU976140/2014-12/Henan	Henan	0	0	1
HQ701729/2009-1/Shandong	Shandong	0	0	1
EU140604/2007-3/Guizhou	Guizhou	0	0	1
HQ701732/2008-5/Shandong	Shandong	0	0	1
EU140605/2007-3/Guizhou	Guizhou	1972	0	1
EU140606/2007-3/Guizhou	Guizhou	1972	1	0
EU140611/2007-3/Guizhou	Guizhou	1972	1	0
FJ947000/2008-6/Guizhou	Guizhou	0	0	1
HQ701730/2008-5/Shandong	Shandong	0	0	1
FJ897565/2008-5/Anhui	Anhui	0	0	1
HQ701733/2010-1/Shandong	Shandong	0	0	1
HM114312/2007-3/Fujian	Fujian	0	0	1
HQ701731/2008-5/Shandong	Shandong	0	0	1
EU709834/2007-8/Sichuan	Sichuan	0	0	1
JF920761/2007-8/Yunnan	Yunnan	0	0	1
FJ361891/2008-6/Yunnan	Yunnan	1976	0	1
JF920775/2008-1/Yunnan	Yunnan	1976	1	0
JF920798/2009-1/Yunnan	Yunnan	1976	1	0
EU213133/2009-3/Hunan	Hunan	0	0	1
EU346383/2008-3/Hebei	Hebei	0	0	1
EU213093/2009-3/Anhui	Anhui	0	0	1
EU213129/2009-3/Hunan	Hunan	0	0	1
EU213125/2009-3/Hunan	Hunan	0	0	1
GU358694/2014-6/Fujian	Fujian	0	0	1
JQ798271/2011-2/Zhejiang	Zhejiang	0	0	1
EU213094/2009-3/Anhui	Anhui	0	0	1
EU371955/2011-2/Anhui	Anhui	0	0	1
EU187484/2016-1/Hubei	Hubei	1991	1	0
FJ870111/2009-6/Hubei	Hubei	1991	0	1
FJ870114/2009-6/Hubei	Hubei	1991	1	0
FJ870115/2010-6/Hubei	Hubei	1991	1	0
FJ870122/2009-6/Hubei	Hubei	1991	1	0
HQ832159/2009-1/Hubei	Hubei	1991	1	0
HQ832160/2009-5/Hubei	Hubei	1991	1	0
EU371947/2011-2/Jiangxi	Jiangxi	2000	0	1
EU371949/2011-2/Jiangxi	Jiangxi	2000	1	0
EU371948/2011-2/Jiangxi	Jiangxi	2002	0	1
EU399845/2011-2/Jiangxi	Jiangxi	2002	1	0
EU399849/2011-2/Jiangxi	Jiangxi	2002	1	0
EU399848/2011-2/Jiangxi	Jiangxi	2002	1	0
EU399847/2011-2/Jiangxi	Jiangxi	2002	1	0
EU399858/2011-2/Hubei	Hubei	0	0	1
EU399859/2011-2/Jiangxi	Jiangxi	0	0	1
EU399860/2011-2/Anhui	Anhui	0	0	1
EU371945/2011-2/Henan	Henan	0	0	1
KC618119/2012-8/Guangxi	Guangxi	0	0	1
EU563949/2008-3/Hubei	Hubei	0	0	1
KY620029/2016-9/Chongqing	Chongqing	0	0	1
JQ828951/2008-1/Guangdong	Guangdong	0	0	1
EU480747/2009-3/Jiangsu	Jiangsu	0	0	1
EU480755/2009-3/Zhejiang	Zhejiang	0	0	1
FJ237418/2007-8/Henan	Henan	0	0	1
EF075945/2016-1/Hubei	Hubei	0	0	1
KC454374/2010-2/Anhui	Anhui	0	0	1
KY798924/2016-12/Fujian	Fujian	0	0	1
KY798923/2016-12/Fujian	Fujian	0	0	1
JQ007311/2007-5/Gansu	Gansu	2081	0	1
JQ007314/2009-1/Gansu	Gansu	2081	1	0
FJ800796/2004-6/Hubei	Hubei	0	0	1
HM011104/2007-1/Beijing	Beijing	0	0	1
EU213114/2009-3/Henan	Henan	0	0	1
JQ715697/2011-2/Guangdong	Guangdong	0	0	1
EU480750/2009-3/Jiangxi	Jiangxi	0	0	1
FJ800790/2009-6/Hubei	Hubei	0	0	1
JN543519/2015-8/Jiangxi	Jiangxi	0	0	1
EF487536/2007-3/Shandong	Shandong	0	0	1
EU480714/2009-3/Zhejiang	Zhejiang	0	0	1
KJ525650/2007-5/Jilin	Jilin	0	0	1
EU480752/2009-3/Jiangxi	Jiangxi	0	0	1
HQ832094/2006-8/Jiangsu	Jiangsu	0	0	1
FJ712029/2009-3/Sichuan	Sichuan	0	0	1
GU461292/2007-7/Anhui	Anhui	0	0	1
GU233504/2006-12/Shandong	Shandong	0	0	1
HQ832236/2010-2/Guangdong	Guangdong	0	0	1
HQ832246/2010-2/Jiangsu	Jiangsu	0	0	1
KF562291/2010-2/Jiangsu	Jiangsu	0	0	1
KF562268/2008-7/Anhui	Anhui	0	0	1
KF562309/2009-8/Zhejiang	Zhejiang	0	0	1
KP771775/2012-9/Chongqing	Chongqing	0	0	1
EU480746/2009-3/Jiangsu	Jiangsu	0	0	1
GuangdongChaozhou_2010_06_21_China_zhanglab/2010-6/Guangdong	Guangdong	2104	0	1
GuangdongShantou_2010_06_25_China_zhanglab/2010-6/Guangdong	Guangdong	2104	1	0
HBQJXMGP5_Hubei_Qianjiang_20160122_China_zhanglab/2016-1/Hubei	Hubei	0	0	1
MN306078/2016-11/Shandong	Shandong	2124	1	0
MN306079/2013-11/Shandong	Shandong	2124	0	1
MN306072/2016-11/Shandong	Shandong	2125	1	0
MN306080/2015-11/Shandong	Shandong	2125	0	1
KP771783/2014-9/Beijing	Beijing	0	0	1
KU898932/2018-12/Guangxi	Guangxi	0	0	1
NPXL-GP5_Fujian_Nanping_20140825_China_zhanglab/2014-8/Fujian	Fujian	0	0	1
KR048688/2013-11/Fujian	Fujian	2130	1	0
KU215417/2015-9/Fujian	Fujian	2130	0	1
KT208328/2015-11/Hubei	Hubei	0	0	1
KY964304/2017-2/Henan	Henan	0	0	1
KU898915/2015-12/Guangxi	Guangxi	2133	0	1
KU898934/2008-12/Guangxi	Guangxi	2133	1	0
KY798937/2015-12/Fujian	Fujian	0	0	1
KU997077/2015-8/Guangdong	Guangdong	2135	1	0
M-9_Guangdong_2017_11_42_AM_China_zhanglab/2017-11/Guangdong	Guangdong	2135	0	1
KY798925/2016-12/Fujian	Fujian	2136	0	1
MT721741/2018-11/Fujian	Fujian	2136	1	0
MN148370/2019-4/Xinjiang	Xinjiang	0	0	1
HNZZJD3gp5_Henan_Zhen_zhou_20160122_China_zhanglab/2016-1/Henan	Henan	2137	0	1
MN548298/2019-5/Henan	Henan	2137	1	0
KT424224/2014-9/Henan	Henan	0	0	1
KU997031/2015-8/Guangdong	Guangdong	0	0	1
KU898924/2015-12/Guangxi	Guangxi	2141	0	1
KU898933/2015-12/Guangxi	Guangxi	2141	1	0
KX253992/2015-8/Fujian	Fujian	0	0	1
KU898926/2015-12/Guangxi	Guangxi	2143	1	0
KX077658/2016-11/Guangxi	Guangxi	2143	0	1
M-20170301-gp5-Guangdong_2017_04_02_PM_China_zhanglab/2017-4/Guangdong	Guangdong	0	0	1
KT208331/2015-11/Guangdong	Guangdong	0	0	1
KX815410/2015-11/Guangdong	Guangdong	0	0	1
KJ534540/2013-6/Henan	Henan	0	0	1
KR018776/2013-12/Guangdong	Guangdong	0	0	1
KU898908/2014-12/Guangxi	Guangxi	0	0	1
KR080339/2015-2/Xinjiang	Xinjiang	0	0	1
KU997062/2015-8/Guangdong	Guangdong	0	0	1
MK943856/2015-12/Guizhou	Guizhou	0	0	1
MK943855/2015-12/Hubei	Hubei	0	0	1
KM013935/2013-11/Guangxi	Guangxi	0	0	1
MK943853/2015-12/Hubei	Hubei	0	0	1
KY798938/2015-12/Fujian	Fujian	0	0	1
KR056088/2014-9/Guangdong	Guangdong	0	0	1
MN879319/2019-12/Shanxi	Shanxi	0	0	1
MK943885/2014-10/Guangdong	Guangdong	0	0	1
KU997029/2015-8/Guangdong	Guangdong	0	0	1
MK943912/2013-10/Henan	Henan	0	0	1
KU997036/2015-8/Guangdong	Guangdong	2166	1	0
KU997086/2015-8/Guangdong	Guangdong	2166	1	0
KU997088/2015-8/Guangdong	Guangdong	2166	0	1
KU997085/2015-8/Guangdong	Guangdong	2166	1	0
MK943850/2015-12/Hubei	Hubei	0	0	1
KM229527/2013-9/Jilin	Jilin	0	0	1
KX228527/2014-5/Guangdong	Guangdong	0	0	1
MK943859/2015-12/Hubei	Hubei	0	0	1
MK943864/2015-12/Guangdong	Guangdong	0	0	1
KU000012/2015-5/Henan	Henan	0	0	1
MK943890/2016-10/Hubei	Hubei	2177	1	0
MT268280/2018-5/Hubei	Hubei	2177	0	1
KY488476/2016-12/Guangdong	Guangdong	0	0	1
KU997054/2015-8/Guangdong	Guangdong	0	0	1
MK943860/2015-12/Anhui	Anhui	0	0	1
MT811825/2018-6/Yunnan	Yunnan	0	0	1
MN508255/2013-11/Tianjin	Tianjin	0	0	1
MT316312/2019-7/Hubei	Hubei	0	0	1
RC1-GP5_2014_China_zhanglab/2014-1/Guangdong	Guangdong	0	0	1
KT030968/2012-12/Sichuan	Sichuan	0	0	1
KY798933/2015-12/Fujian	Fujian	0	0	1
KU997028/2015-8/Guangdong	Guangdong	0	0	1
KU997048/2015-8/Guangdong	Guangdong	0	0	1
KY924478/2016-11/Fujian	Fujian	0	0	1
MW627193/2018-10/Hubei	Hubei	0	0	1
lz-1-GP5_Guangdong_Guangzhou_20130925_China_zhanglab/2013-9/Guangdong	Guangdong	0	0	1
KU997067/2015-8/Guangdong	Guangdong	2190	1	0
RC4-GP5_20140224_China_zhanglab/2014-2/Guangdong	Guangdong	2190	0	1
MW651975/2019-8/Hubei	Hubei	0	0	1
KX077661/2014-9/Guangxi	Guangxi	0	0	1
KU997046/2015-8/Guangdong	Guangdong	0	0	1
KY798928/2015-12/Fujian	Fujian	0	0	1
MK943858/2015-12/Guizhou	Guizhou	0	0	1
KU997071/2015-8/Guangdong	Guangdong	2194	1	0
KU997072/2015-8/Guangdong	Guangdong	2194	1	0
KU997076/2015-8/Guangdong	Guangdong	2194	1	0
KU997084/2015-8/Guangdong	Guangdong	2194	0	1
MT268961/2016-12/Sichuan	Sichuan	0	0	1
M-wtlb-gp5-Guangdong_2017_05_20_PM_China_zhanglab/2017-5/Guangdong	Guangdong	0	0	1
KR018804/2014-9/Guangdong	Guangdong	0	0	1
MN306073/2016-11/Shandong	Shandong	0	0	1
MN119306/2017-4/Shanghai	Shanghai	0	0	1
KT030972/2013-3/Sichuan	Sichuan	0	0	1
KX357708/2016-11/Shandong	Shandong	0	0	1
MK943884/2014-10/Hubei	Hubei	0	0	1
MK943906/2013-10/Jiangxi	Jiangxi	0	0	1
MK943863/2015-12/Henan	Henan	0	0	1
KT030982/2013-12/Sichuan	Sichuan	0	0	1
KU950375/2015-11/Henan	Henan	0	0	1
KY620033/2016-10/Sichuan	Sichuan	0	0	1
RC3-GP5_2014_China_zhanglab/2014-3/Guangdong	Guangdong	0	0	1
KT208347/2014-9/Guangdong	Guangdong	0	0	1
KT804696/2014-9/Fujian	Fujian	0	0	1
KX815416/2015-11/Hunan	Hunan	2215	0	1
KX815417/2015-11/Hunan	Hunan	2215	1	0
KX815408/2015-11/Guangdong	Guangdong	0	0	1
KX077655/2014-9/Guangxi	Guangxi	0	0	1
KX815407/2015-11/Guangdong	Guangdong	0	0	1
KY426787/2016-12/Fujian	Fujian	0	0	1
MN642103/2016-12/Shandong	Shandong	0	0	1
MN548292/2018-11/Henan	Henan	0	0	1
MK943861/2015-12/Hubei	Hubei	0	0	1
KU997065/2015-8/Guangdong	Guangdong	0	0	1
KX077660/2014-9/Guangxi	Guangxi	0	0	1
HY-GD-1217-GP5_Guangdong_20131217_China_zhanglab/2013-12/Guangdong	Guangdong	0	0	1
KJ534543/2013-7/Henan	Henan	0	0	1
KJ534542/2013-7/Henan	Henan	0	0	1
KY761966/2016-1/Jiangsu	Jiangsu	0	0	1
KX815429/2015-11/Jiangsu	Jiangsu	0	0	1
KY488477/2016-12/Guangdong	Guangdong	0	0	1
KX815430/2015-11/Jiangxi	Jiangxi	0	0	1
KU898936/2016-12/Guangxi	Guangxi	2228	0	1
KU898937/2014-12/Guangxi	Guangxi	2228	1	0
KY488479/2016-12/Guangdong	Guangdong	0	0	1
KP742986/2014-9/Henan	Henan	0	0	1
HQ233604/2006-8/Jiangxi	Jiangxi	0	0	1
MK943870/2014-12/Hubei	Hubei	0	0	1
KT961399/2014-4/Jiangsu	Jiangsu	0	0	1
KT961400/2014-3/Jiangsu	Jiangsu	0	0	1
KT961419/2014-10/Fujian	Fujian	0	0	1
KT961425/2014-8/Anhui	Anhui	0	0	1
KT961393/2014-3/Jiangxi	Jiangxi	0	0	1
KT961395/2015-4/Jiangxi	Jiangxi	0	0	1
KT961413/2015-5/Guangdong	Guangdong	0	0	1
KU163053/2015-9/Shandong	Shandong	0	0	1
MF095234/2014-9/Beijing	Beijing	0	0	1
EU213140/2009-3/Shandong	Shandong	0	0	1
FJ147205/2008-3/Henan	Henan	2242	1	0
KX766378/2007-5/Henan	Henan	2242	0	1
JN885591/2008-2/Guangdong	Guangdong	0	0	1
EU595690/2008-3/Zhejiang	Zhejiang	0	0	1
Guangdong4_2010_05_17_6-1_China_zhanglab/2010-5/Guangdong	Guangdong	2245	1	0
Guangdong5_2010_05_17_7-4_China_zhanglab/2010-5/Guangdong	Guangdong	2245	1	0
GuangdongZhongshan_2010_06_23_China_zhanglab/2010-6/Guangdong	Guangdong	2245	0	1
KF768118/2013-9/Guangdong	Guangdong	2245	1	0
Guangdong6_2010_05_17_8-1_China_zhanglab/2010-5/Guangdong	Guangdong	2245	1	0
JQ828973/2009-1/Guangdong	Guangdong	2245	1	0
KT208351/2014-9/Guangdong	Guangdong	2245	1	0
KT030970/2013-1/Sichuan	Sichuan	2251	1	0
KT030981/2013-12/Sichuan	Sichuan	2251	0	1
JX046250/2010-2/Guangxi	Guangxi	2252	1	0
JX046277/2010-2/Guangxi	Guangxi	2252	1	0
JX046263/2010-2/Guangxi	Guangxi	2252	1	0
JX046264/2010-2/Guangxi	Guangxi	2252	1	0
JX046321/2010-2/Guangxi	Guangxi	2252	1	0
JX046308/2010-2/Guangxi	Guangxi	2252	1	0
JX046285/2010-2/Guangxi	Guangxi	2252	1	0
JX046276/2009-1/Guangxi	Guangxi	2252	1	0
JX046273/2009-1/Guangxi	Guangxi	2252	0	1
JX046274/2009-1/Guangxi	Guangxi	2252	1	0
JX046275/2009-1/Guangxi	Guangxi	2252	1	0
jianbang-1-GP5_20131028_2_China_zhanglab/2013-10/Guangdong	Guangdong	0	0	1
EU109502/2007-3/Liaoning	Liaoning	0	0	1
FJ919341/2008-10/Chongqing	Chongqing	0	0	1
EU213141/2009-3/Tianjin	Tianjin	2271	0	1
EU213142/2009-3/Tianjin	Tianjin	2271	1	0
FJ870117/2009-6/Hubei	Hubei	0	0	1
FJ950746/2007-10/Beijing	Beijing	0	0	1
GQ466014/2008-5/Shandong	Shandong	0	0	1
HM213860/2008-5/Guangdong	Guangdong	0	0	1
HM213861/2008-5/Guangdong	Guangdong	0	0	1
FJ800768/2009-6/Guangxi	Guangxi	0	0	1
JQ828961/2009-1/Guangdong	Guangdong	0	0	1
FJ800769/2009-6/Guangxi	Guangxi	2280	1	0
FJ800772/2005-6/Guangxi	Guangxi	2280	0	1
FJ800775/2007-6/Guangxi	Guangxi	2280	1	0
JQ828955/2008-1/Guangdong	Guangdong	0	0	1
FJ800773/2006-6/Guangxi	Guangxi	0	0	1
GU980172/2007-8/Guangdong	Guangdong	0	0	1
KC618111/2011-11/Guangxi	Guangxi	0	0	1
HM232837/2015-8/Heilongjiang	Heilongjiang	0	0	1
JX046281/2007-5/Guangxi	Guangxi	0	0	1
HQ832238/2010-2/Shandong	Shandong	0	0	1
EU912573/2009-3/Hubei	Hubei	0	0	1
JX215551/2011-1/Guangdong	Guangdong	2291	1	0
KF768111/2012-9/Guangdong	Guangdong	2291	0	1
JX215554/2011-5/Guangdong	Guangdong	2291	1	0
HM853673/2008-9/Hubei	Hubei	0	0	1
JQ326271/2011-9/Hubei	Hubei	0	0	1
KJ854745/2012-9/Yunnan	Yunnan	0	0	1
HM213862/2008-5/Guangdong	Guangdong	2295	0	1
JQ828956/2008-1/Guangdong	Guangdong	2295	1	0
HQ832239/2010-2/Henan	Henan	0	0	1
KT961423/2015-1/Anhui	Anhui	0	0	1
HQ832235/2010-2/Shandong	Shandong	0	0	1
KY798921/2016-12/Fujian	Fujian	0	0	1
FJ548854/2016-1/Jiangxi	Jiangxi	0	0	1
FJ-2016-0305_FJ-2016-0305_FJ-2016-0305_China_zhanglab/2016-3/Fujian	Fujian	0	0	1
FJ800754/2007-6/Beijing	Beijing	0	0	1
EU152112/2007-7/Jiangxi	Jiangxi	0	0	1
GU980158/2007-7/Guangdong	Guangdong	0	0	1
Guangdong3_2010_05_17_5-2_China_zhanglab/2010-5/Guangdong	Guangdong	0	0	1
MZ322856/2016-11/Fujian	Fujian	0	0	1
MK943868/2015-12/Henan	Henan	2305	1	0
MK943869/2015-12/Henan	Henan	2305	0	1
HQ832130/2009-1/Hebei	Hebei	0	0	1
JQ007312/2007-5/Gansu	Gansu	2308	1	0
JQ007315/2009-1/Gansu	Gansu	2308	0	1
JX046282/2007-5/Guangxi	Guangxi	0	0	1
FJ422127/2006-8/Shandong	Shandong	2309	1	0
FJ422128/2006-8/Shandong	Shandong	2309	0	1
EU008759/2007-3/Hebei	Hebei	0	0	1
EU008761/2007-3/Hebei	Hebei	0	0	1
FJ919334/2008-10/Guangdong	Guangdong	0	0	1
FJ919336/2008-10/Chongqing	Chongqing	0	0	1
EU371946/2011-2/Jiangxi	Jiangxi	0	0	1
EU480723/2009-3/Zhejiang	Zhejiang	0	0	1
HM213871/2008-5/Guangdong	Guangdong	0	0	1
EU399851/2011-2/Hunan	Hunan	0	0	1
EU399853/2011-2/Hunan	Hunan	0	0	1
GU980173/2007-8/Guangdong	Guangdong	0	0	1
EU152108/2007-7/Jiangxi	Jiangxi	0	0	1
JN885590/2008-2/Guangdong	Guangdong	0	0	1
KP814045/2013-3/Shandong	Shandong	0	0	1
JN885592/2008-2/Guangdong	Guangdong	0	0	1
EU480743/2009-3/Zhejiang	Zhejiang	0	0	1
EU480748/2009-3/Jiangxi	Jiangxi	0	0	1
JN885600/2008-1/Guangdong	Guangdong	0	0	1
GQ374442/2008-5/Guangdong	Guangdong	0	0	1
GU980160/2007-7/Guangdong	Guangdong	2333	0	1
GU980179/2007-6/Guangdong	Guangdong	2333	1	0
GU980183/2007-6/Guangdong	Guangdong	2333	1	0
KP793736/2011-6/Guangdong	Guangdong	2333	1	0
EU709832/2007-11/Jiangsu	Jiangsu	0	0	1
JN885584/2007-7/Guangdong	Guangdong	0	0	1
HM213864/2008-5/Guangdong	Guangdong	0	0	1
FJ422130/2006-8/Shandong	Shandong	0	0	1
GU980169/2007-7/Guangdong	Guangdong	0	0	1
EU480749/2009-3/Zhejiang	Zhejiang	0	0	1
GU980166/2007-6/Guangdong	Guangdong	0	0	1
14hncs-GP5_Hunan_2014_China_zhanglab/2014-10/Hunan	Hunan	0	0	1
GDEPgp5_Guangdong_Jiang_men_20160322_China_zhanglab/2016-3/Guangdong	Guangdong	0	0	1
KP771741/2013-9/Shandong	Shandong	0	0	1
KR149645/2015-9/Jiangxi	Jiangxi	0	0	1
KT030965/2012-5/Sichuan	Sichuan	0	0	1
KT424227/2014-9/Henan	Henan	0	0	1
KY620026/2016-3/Sichuan	Sichuan	0	0	1
KX815424/2015-11/Liaoning	Liaoning	0	0	1
MT811829/2016-10/Yunnan	Yunnan	0	0	1
JX046259/2008-1/Guangxi	Guangxi	0	0	1
KF768122/2013-9/Guangdong	Guangdong	0	0	1
KP771742/2013-9/Hubei	Hubei	0	0	1
GZ4-GD-1022-GP5_Guangdong_GuangZhou_20131022_China_zhanglab/2013-10/Guangdong	Guangdong	0	0	1
1646978_5-GP5_Guangdong_201310224_China_zhanglab/2013-10/Guangdong	Guangdong	0	0	1
1646978_2-GP5_Guangdong_20131024_China_zhanglab/2013-10/Guangdong	Guangdong	0	0	1
JX014355/2011-2/Xinjiang	Xinjiang	0	0	1
KU000013/2015-5/Henan	Henan	0	0	1
KR048686/2014-4/Fujian	Fujian	3012	1	0
KR048687/2013-4/Fujian	Fujian	3012	0	1
KY426788/2016-12/Fujian	Fujian	3012	1	0
1644260_1-GP5_Guangdong_20131023_China_zhanglab/2013-10/Guangdong	Guangdong	0	0	1
1785624_LXG-GP5_Guangdong_20131228_China_zhanglab/2013-12/Guangdong	Guangdong	0	0	1
KT208295/2014-9/Fujian	Fujian	0	0	1
JX192633/2010-4/Guangdong	Guangdong	0	0	1
KF768113/2012-9/Guangdong	Guangdong	3022	1	0
wj-NDP2-23-GP5_Guangdong_Dongguan_20140121_China_zhanglab/2014-1/Guangdong	Guangdong	3022	0	1
GuangdongJiangmenTaishan-97_2010_09_10_China_zhanglab/2010-9/Guangdong	Guangdong	3023	1	0
wj-HUN-GP5_Guangdong_Dongguan_20140121_China_zhanglab/2014-1/Guangdong	Guangdong	3023	1	0
KT208303/2014-9/Guangdong	Guangdong	3023	0	1
FJ-2016-0503_Fujian_2016_China_zhanglab/2016-5/Fujian	Fujian	0	0	1
HZ1-GD-1024-GP5_Guangdong_Huizhou_20131024_China_zhanglab/2013-10/Guangdong	Guangdong	0	0	1
EU624117/2007-5/Guangdong	Guangdong	0	0	1
KM377850/2012-11/Anhui	Anhui	0	0	1
KT030980/2013-3/Sichuan	Sichuan	0	0	1
FJ800781/2007-6/Hebei	Hebei	0	0	1
FJ422126/2006-8/Shandong	Shandong	0	0	1
AB359235/2006-12/Henan	Henan	0	0	1
EF014225/2006-12/Jiangxi	Jiangxi	0	0	1
EU213146/2009-3/Zhejiang	Zhejiang	0	0	1
JN885585/2007-8/Guangdong	Guangdong	0	0	1
FJ800793/2008-6/Henan	Henan	0	0	1
FJ800803/2009-6/Sichuan	Sichuan	0	0	1
EU152110/2007-7/Jiangsu	Jiangsu	0	0	1
EU480718/2009-3/Zhejiang	Zhejiang	0	0	1
FJ870107/2009-6/Zhejiang	Zhejiang	0	0	1
JQ828971/2009-1/Guangdong	Guangdong	0	0	1
HM213878/2008-5/Guangxi	Guangxi	3045	1	0
HM213879/2008-5/Guangxi	Guangxi	3045	0	1
JF800911/2009-12/Shandong	Shandong	0	0	1
JX046283/2009-1/Guangxi	Guangxi	3047	1	0
JX046289/2009-1/Guangxi	Guangxi	3047	1	0
JX046290/2009-1/Guangxi	Guangxi	3047	0	1
JX046287/2009-1/Guangxi	Guangxi	3047	1	0
JX046318/2007-5/Guangxi	Guangxi	0	0	1
HM213880/2008-5/Guangxi	Guangxi	0	0	1
JN885599/2008-1/Guangdong	Guangdong	0	0	1
JX046284/2007-5/Guangxi	Guangxi	3051	1	0
JX046286/2007-5/Guangxi	Guangxi	3051	1	0
JX046288/2007-5/Guangxi	Guangxi	3051	0	1
JX046307/2009-1/Guangxi	Guangxi	3051	1	0
JF906864/2008-12/Guangxi	Guangxi	0	0	1
JQ828941/2007-5/Guangdong	Guangdong	3055	0	1
JQ828942/2007-5/Guangdong	Guangdong	3055	1	0
JQ828945/2007-5/Guangdong	Guangdong	3055	1	0
JQ828943/2007-5/Guangdong	Guangdong	3055	1	0
JQ828946/2007-5/Guangdong	Guangdong	3055	1	0
JQ828948/2007-5/Guangdong	Guangdong	3055	1	0
JQ828944/2007-5/Guangdong	Guangdong	3055	1	0
JX046260/2008-1/Guangxi	Guangxi	0	0	1
JQ828947/2007-5/Guangdong	Guangdong	0	0	1
EF112447/2007-3/Hebei	Hebei	0	0	1
EU480711/2009-3/Zhejiang	Zhejiang	0	0	1
FJ919339/2008-10/Chongqing	Chongqing	3066	0	1
KY620020/2015-11/Chongqing	Chongqing	3066	1	0
FJ950747/2007-2/Beijing	Beijing	0	0	1
EU200961/2016-1/Jiangxi	Jiangxi	0	0	1
EU213122/2009-3/Hunan	Hunan	0	0	1
EU399867/2011-2/Jiangxi	Jiangxi	0	0	1
EU595691/2008-3/Zhejiang	Zhejiang	0	0	1
FJ495081/2007-8/Hubei	Hubei	0	0	1
GQ499196/2008-5/Jiangxi	Jiangxi	0	0	1
EU097706/2016-1/Beijing	Beijing	0	0	1
EU152111/2007-3/Jiangsu	Jiangsu	0	0	1
EU480721/2009-3/Zhejiang	Zhejiang	0	0	1
EU595696/2008-3/Zhejiang	Zhejiang	0	0	1
HM027581/2014-6/Shandong	Shandong	0	0	1
JQ798284/2012-3/Zhejiang	Zhejiang	0	0	1
FJ800807/2009-6/Tianjin	Tianjin	0	0	1
KP771754/2008-1/Hebei	Hebei	0	0	1
HQ388394/2009-12/Shandong	Shandong	0	0	1
JF906869/2009-12/Guangxi	Guangxi	0	0	1
KF416332/2013-9/Henan	Henan	0	0	1
KU997049/2015-8/Guangdong	Guangdong	3083	0	1
KU997050/2015-8/Guangdong	Guangdong	3083	1	0
MN548299/2019-5/Henan	Henan	0	0	1
FJ800752/2006-6/Beijing	Beijing	0	0	1
AB359236/2006-12/Henan	Henan	0	0	1
HQ416720/2008-3/Shandong	Shandong	3091	1	0
JX087437/2012-4/Shandong	Shandong	3091	0	1
GQ475526/2014-6/Jiangxi	Jiangxi	3092	0	1
GQ499194/2008-5/Jiangxi	Jiangxi	3092	1	0
EF488048/2007-11/Shanghai	Shanghai	0	0	1
Guangdong_2006_China_zhanglab/2006-1/Guangdong	Guangdong	0	0	1
GU980171/2007-8/Guangdong	Guangdong	0	0	1
EU213132/2009-3/Hunan	Hunan	0	0	1
JN994597/2007-8/Xinjiang	Xinjiang	3096	0	1
JN994599/2008-1/Xinjiang	Xinjiang	3096	1	0
JN994602/2009-1/Xinjiang	Xinjiang	3096	1	0
JN994600/2009-1/Xinjiang	Xinjiang	3096	1	0
EU480753/2009-3/Jiangxi	Jiangxi	0	0	1
FJ797690/2006-9/Henan	Henan	0	0	1
HM213865/2008-5/Guangdong	Guangdong	0	0	1
JX046314/2008-1/Guangxi	Guangxi	0	0	1
KT961387/2015-3/Jiangsu	Jiangsu	0	0	1
JX046316/2008-1/Guangxi	Guangxi	0	0	1
KT819203/2014-12/Sichuan	Sichuan	3108	0	1
MT268949/2017-11/Sichuan	Sichuan	3108	1	0
KT961405/2015-7/Henan	Henan	0	0	1
KT961380/2015-4/Zhejiang	Zhejiang	0	0	1
KT961396/2015-2/Jiangsu	Jiangsu	0	0	1
KT961408/2015-4/Henan	Henan	0	0	1
KT961416/2015-4/Fujian	Fujian	0	0	1
KT961389/2015-6/Jiangxi	Jiangxi	0	0	1
KT961421/2014-4/Fujian	Fujian	0	0	1
KT961394/2015-5/Jiangsu	Jiangsu	0	0	1
KT961409/2015-3/Hunan	Hunan	0	0	1
KT961422/2015-5/Anhui	Anhui	0	0	1
EU213128/2009-3/Hunan	Hunan	0	0	1
EU213131/2009-3/Hunan	Hunan	0	0	1
KP771755/2008-1/Chongqing	Chongqing	0	0	1
FJ800788/2007-6/Hubei	Hubei	0	0	1
JF906862/2008-5/Guangxi	Guangxi	0	0	1
EF398045/2006-8/Jiangxi	Jiangxi	0	0	1
FJ712031/2009-3/Anhui	Anhui	0	0	1
FJ919330/2008-10/Chongqing	Chongqing	0	0	1
JF906884/2008-11/Guangxi	Guangxi	0	0	1
FJ919335/2008-10/Chongqing	Chongqing	0	0	1
JQ828966/2009-1/Guangdong	Guangdong	0	0	1
HM213876/2008-5/Guangdong	Guangdong	0	0	1
JF906870/2008-11/Guangxi	Guangxi	0	0	1
GD6-08-GP5_Guangdong_2008_China_zhanglab/2008-6/Guangdong	Guangdong	0	0	1
Guangdong5_2008_10_21_China_zhanglab/2008-10/Guangdong	Guangdong	0	0	1
JF906871/2008-6/Guangxi	Guangxi	3135	0	1
JF906872/2008-12/Guangxi	Guangxi	3135	1	0
JN885593/2008-5/Guangdong	Guangdong	0	0	1
JN885597/2008-9/Guangdong	Guangdong	0	0	1
JX046315/2008-1/Guangxi	Guangxi	0	0	1
JX046294/2009-1/Guangxi	Guangxi	0	0	1
GuangdongZhaoqing-5_2010_08_27_China_zhanglab/2010-8/Guangdong	Guangdong	3140	0	1
JN885594/2008-6/Guangdong	Guangdong	3140	1	0
HM213875/2008-5/Guangdong	Guangdong	0	0	1
KC415267/2009-1/Fujian	Fujian	0	0	1
HM213869/2008-5/Guangdong	Guangdong	3144	0	1
JQ828960/2009-1/Guangdong	Guangdong	3144	1	0
JF906859/2008-7/Guangxi	Guangxi	0	0	1
KC454380/2011-2/Heilongjiang	Heilongjiang	3146	1	0
KC454381/2012-9/Heilongjiang	Heilongjiang	3146	0	1
KC454385/2011-2/Heilongjiang	Heilongjiang	3146	1	0
JF906877/2009-1/Guangxi	Guangxi	0	0	1
JQ828958/2009-1/Guangdong	Guangdong	0	0	1
JQ828949/2008-1/Guangdong	Guangdong	0	0	1
EU480725/2009-3/Zhejiang	Zhejiang	0	0	1
GU980174/2007-8/Guangdong	Guangdong	0	0	1
KP998477/2015-9/Fujian	Fujian	0	0	1
GQ374441/2007-8/Guangdong	Guangdong	3152	1	0
GU980182/2007-6/Guangdong	Guangdong	3152	1	0
GU980163/2007-6/Guangdong	Guangdong	3152	1	0
GU980165/2006-10/Guangdong	Guangdong	3152	0	1
GU980181/2007-3/Guangdong	Guangdong	3152	1	0
EU109503/2007-3/Guangdong	Guangdong	0	0	1
EU213111/2009-3/Hubei	Hubei	0	0	1
JN157763/2011-2/Jilin	Jilin	0	0	1
KF741693/2012-4/Heilongjiang	Heilongjiang	0	0	1
EU213116/2009-3/Heilongjiang	Heilongjiang	0	0	1
EU213118/2009-3/Heilongjiang	Heilongjiang	0	0	1
EU480717/2009-3/Zhejiang	Zhejiang	0	0	1
EU480751/2009-3/Zhejiang	Zhejiang	0	0	1
FJ919337/2008-10/Chongqing	Chongqing	0	0	1
HQ843181/2009-1/Beijing	Beijing	0	0	1
GQ359108/2008-9/Shandong	Shandong	0	0	1
HM213882/2008-5/Jiangsu	Jiangsu	0	0	1
FJ237421/2007-9/Henan	Henan	3170	1	0
FJ237426/2008-1/Henan	Henan	3170	0	1
MT268920/2016-11/Sichuan	Sichuan	0	0	1
MZ172971/2020-8/Shandong	Shandong	0	0	1
KF562282/2009-5/Jiangsu	Jiangsu	0	0	1
EF517962/2016-1/Hunan	Hunan	3175	0	1
EU213126/2009-3/Hunan	Hunan	3175	1	0
EU825723/2007-3/Beijing	Beijing	3176	1	0
KP890337/2013-2/Beijing	Beijing	3176	1	0
KP890338/2013-2/Beijing	Beijing	3176	0	1
KP890340/2013-2/Beijing	Beijing	3176	1	0
FJ237433/2008-5/Henan	Henan	0	0	1
GU232736/2014-6/Guangdong	Guangdong	3180	1	0
JN885619/2010-7/Guangdong	Guangdong	3180	1	0
HM213895/2009-1/Guangdong	Guangdong	3180	1	0
JN885611/2010-6/Guangdong	Guangdong	3180	1	0
HM213891/2009-1/Guangdong	Guangdong	3180	1	0
KU997075/2015-8/Guangdong	Guangdong	3180	1	0
KR612136/2011-3/Guangdong	Guangdong	3180	1	0
JN885589/2007-8/Guangdong	Guangdong	3180	1	0
KR018758/2011-5/Guangdong	Guangdong	3180	1	0
KR612139/2011-6/Guangdong	Guangdong	3180	0	1
KR612127/2010-8/Guangdong	Guangdong	3180	1	0
KR018768/2013-3/Guangdong	Guangdong	3180	1	0
GU232738/2008-11/Guangdong	Guangdong	3180	1	0
HM213897/2009-1/Guangdong	Guangdong	3180	1	0
HM213898/2009-1/Guangdong	Guangdong	3180	1	0
JN885610/2010-9/Guangdong	Guangdong	3180	1	0
JN885629/2010-11/Guangdong	Guangdong	3180	1	0
GU232737/2014-6/Guangdong	Guangdong	3180	1	0
JN885607/2009-1/Guangdong	Guangdong	3180	1	0
KR018748/2011-7/Guangdong	Guangdong	3180	1	0
HM213883/2009-1/Guangdong	Guangdong	3180	1	0
KR612121/2010-6/Guangdong	Guangdong	3180	1	0
HM213886/2009-1/Guangdong	Guangdong	3180	1	0
HM213899/2009-1/Guangdong	Guangdong	3180	1	0
GU980157/2007-7/Guangdong	Guangdong	3180	1	0
EF112445/2016-1/Jiangxi	Jiangxi	0	0	1
KF416323/2013-9/Henan	Henan	0	0	1
MK943838/2015-12/Hubei	Hubei	0	0	1
KR018752/2012-4/Guangdong	Guangdong	0	0	1
KT030969/2013-1/Sichuan	Sichuan	0	0	1
KY761962/2016-3/Henan	Henan	0	0	1
KU997083/2015-8/Guangdong	Guangdong	0	0	1
MT268925/2014-11/Sichuan	Sichuan	3212	0	1
MT268927/2017-11/Sichuan	Sichuan	3212	1	0
MT268950/2017-11/Sichuan	Sichuan	3212	1	0
KF562287/2009-10/Jiangsu	Jiangsu	0	0	1
KC263025/2011-2/Guangdong	Guangdong	0	0	1
KP179403/2014-9/Shanghai	Shanghai	0	0	1
HM213885/2009-1/Guangdong	Guangdong	0	0	1
KR018750/2012-3/Guangdong	Guangdong	0	0	1
MF095226/2013-9/Heilongjiang	Heilongjiang	0	0	1
KY806211/2016-11/Sichuan	Sichuan	0	0	1
MK943892/2015-10/Jiangxi	Jiangxi	3223	0	1
MK943893/2015-10/Jiangxi	Jiangxi	3223	1	0
KT030976/2013-10/Sichuan	Sichuan	3224	1	0
KT030978/2013-5/Sichuan	Sichuan	3224	1	0
MT268942/2017-11/Sichuan	Sichuan	3224	1	0
MT268935/2017-11/Sichuan	Sichuan	3224	0	1
2296179_TD-GP5_Guangdong_20141011_China_zhanglab/2014-10/Guangdong	Guangdong	0	0	1
MK943923/2007-10/Hubei	Hubei	3238	0	1
MK943924/2015-10/Hubei	Hubei	3238	1	0
MK943925/2015-10/Hubei	Hubei	3238	1	0
MK943926/2015-10/Hubei	Hubei	3238	1	0
KY129873/2016-7/Hebei	Hebei	0	0	1
JQ798283/2012-3/Zhejiang	Zhejiang	0	0	1
KX815414/2015-11/Henan	Henan	0	0	1
KP771753/2013-9/Hebei	Hebei	0	0	1
KP771762/2012-9/Beijing	Beijing	0	0	1
MT811831/2016-10/Yunnan	Yunnan	0	0	1
KY373218/2014-10/Shandong	Shandong	0	0	1
MF095230/2014-9/Heilongjiang	Heilongjiang	0	0	1
KT424229/2014-9/Henan	Henan	0	0	1
KY508630/2016-9/Guangdong	Guangdong	0	0	1
KY508632/2016-7/Guangdong	Guangdong	0	0	1
FJ548853/2016-1/Jiangxi	Jiangxi	0	0	1
KF416322/2013-9/Henan	Henan	0	0	1
JN885608/2010-2/Guangdong	Guangdong	0	0	1
KR612175/2015-2/Guangdong	Guangdong	0	0	1
MK943878/2015-12/Jiangxi	Jiangxi	0	0	1
JN885627/2010-11/Guangdong	Guangdong	3264	1	0
KT208348/2014-9/Guangdong	Guangdong	3264	0	1
MK943875/2014-12/Hubei	Hubei	3265	1	0
MK943876/2014-12/Hubei	Hubei	3265	0	1
JX144906/2011-2/Hubei	Hubei	0	0	1
KF562273/2009-11/Anhui	Anhui	0	0	1
KF562275/2010-6/Anhui	Anhui	0	0	1
MK943873/2016-12/Henan	Henan	3270	1	0
MK943874/2014-12/Henan	Henan	3270	0	1
KP179402/2014-9/Shanghai	Shanghai	0	0	1
JQ955658/2014-9/Guangxi	Guangxi	0	0	1
M-1-gp5-20170123-Guangdong_2017_China_zhanglab/2017-1/Guangdong	Guangdong	3275	1	0
M-chanfan-gp5-Guangdong_20170113__China_zhanglab/2017-1/Guangdong	Guangdong	3275	0	1
MK943879/2015-12/Hubei	Hubei	0	0	1
KY911194/2016-11/Hebei	Hebei	0	0	1
JX144907/2011-2/Hubei	Hubei	0	0	1
KM261784/2014-3/Hubei	Hubei	0	0	1
KP233996/2014-11/Hebei	Hebei	0	0	1
KR612171/2015-1/Guangdong	Guangdong	3281	1	0
KR612179/2015-3/Guangdong	Guangdong	3281	0	1
KP771738/2014-9/Shandong	Shandong	0	0	1
KU898935/2016-12/Guangxi	Guangxi	0	0	1
MT811824/2017-1/Yunnan	Yunnan	3287	0	1
MT811828/2017-2/Yunnan	Yunnan	3287	1	0
MT811840/2017-3/Yunnan	Yunnan	0	0	1
MT268945/2017-11/Sichuan	Sichuan	0	0	1
MT268938/2017-11/Sichuan	Sichuan	0	0	1
KY426786/2014-12/Fujian	Fujian	3288	1	0
KY798929/2016-12/Fujian	Fujian	3288	0	1
JX144912/2012-7/Hubei	Hubei	0	0	1
KM516149/2014-2/Hebei	Hebei	0	0	1
KP162169/2014-9/Hubei	Hubei	0	0	1
KR780223/2014-12/Henan	Henan	0	0	1
MK943872/2014-12/Hubei	Hubei	0	0	1
KT030974/2013-8/Sichuan	Sichuan	0	0	1
MK943883/2016-10/Henan	Henan	0	0	1
MK943903/2014-10/Hubei	Hubei	0	0	1
M-hd-gp5-20170220-Guangdong_2017_08_46_AM_China_zhanglab/2017-8/Guangdong	Guangdong	0	0	1
JX876923/2011-2/Heilongjiang	Heilongjiang	0	0	1
JX876927/2011-2/Heilongjiang	Heilongjiang	0	0	1
JX876930/2011-2/Heilongjiang	Heilongjiang	0	0	1
KT961407/2015-5/Henan	Henan	0	0	1
M-38_Guangdong_2017_11_52_AM_China_zhanglab/2017-11/Guangdong	Guangdong	0	0	1
KF416331/2013-9/Henan	Henan	0	0	1
KX815426/2015-11/Sichuan	Sichuan	0	0	1
JX876918/2011-2/Heilongjiang	Heilongjiang	0	0	1
MK943880/2015-12/Hubei	Hubei	0	0	1
KF768116/2013-9/Guangdong	Guangdong	0	0	1
KF768112/2012-9/Fujian	Fujian	0	0	1
KT030986/2014-2/Sichuan	Sichuan	3307	1	0
MT268955/2016-12/Sichuan	Sichuan	3307	0	1
KU997079/2015-8/Guangdong	Guangdong	3309	0	1
KU997080/2015-8/Guangdong	Guangdong	3309	1	0
MK943822/2015-12/Fujian	Fujian	0	0	1
KR018753/2012-6/Guangdong	Guangdong	0	0	1
KY202837/2016-6/Hebei	Hebei	0	0	1
KC422725/2009-1/Jiangxi	Jiangxi	0	0	1
KP771749/2011-7/Hebei	Hebei	0	0	1
KX815422/2015-11/Jiangxi	Jiangxi	0	0	1
KR048682/2014-10/Fujian	Fujian	0	0	1
KM233862/2013-9/Gansu	Gansu	0	0	1
KP771750/2013-9/Beijing	Beijing	0	0	1
KP771736/2014-9/Beijing	Beijing	0	0	1
MF095241/2015-11/Heilongjiang	Heilongjiang	0	0	1
MK943904/2013-10/Jiangxi	Jiangxi	0	0	1
KR018769/2013-4/Guangdong	Guangdong	0	0	1
KR080334/2015-2/Xinjiang	Xinjiang	0	0	1
KT022072/2013-9/Henan	Henan	0	0	1
KR612151/2012-3/Guangdong	Guangdong	3322	0	1
KR612154/2012-3/Guangdong	Guangdong	3322	1	0
KU997060/2015-8/Guangdong	Guangdong	3323	1	0
KU997063/2015-8/Guangdong	Guangdong	3323	0	1
KU997061/2015-8/Guangdong	Guangdong	3323	1	0
KU557000/2014-12/Henan	Henan	3325	0	1
KU557001/2014-12/Henan	Henan	3325	1	0
KT030971/2013-2/Sichuan	Sichuan	0	0	1
GDGMXMGP5_Guang_dong_Fo_shan_20160122_China_zhanglab/2016-1/Guangdong	Guangdong	0	0	1
M-zjwz-gp5-20170117-Zhejiang_2017_China_zhanglab/2017-1/Zhejiang	Zhejiang	0	0	1
KU556997/2014-2/Henan	Henan	0	0	1
HY1-GD-1107-GP5_Guangdong_20131107_China_zhanglab/2013-11/Guangdong	Guangdong	0	0	1
JN642707/2010-2/Zhejiang	Zhejiang	0	0	1
KP771759/2012-9/Beijing	Beijing	3338	1	0
KP771761/2012-9/Beijing	Beijing	3338	0	1
MK943834/2015-12/Hubei	Hubei	0	0	1
KT208324/2015-11/Guangdong	Guangdong	0	0	1
HQ832248/2010-2/Jiangxi	Jiangxi	3341	1	0
MK943831/2015-12/Jiangxi	Jiangxi	3341	0	1
JX876928/2011-2/Heilongjiang	Heilongjiang	0	0	1
KP771760/2012-9/Beijing	Beijing	0	0	1
MN026345/2016-11/Guangxi	Guangxi	0	0	1
KT208352/2014-9/Hunan	Hunan	0	0	1
KY508640/2016-10/Jilin	Jilin	0	0	1
KX077662/2014-9/Guangxi	Guangxi	0	0	1
JF748717/2009-1/Zhejiang	Zhejiang	0	0	1
KU557004/2014-1/Henan	Henan	0	0	1
KF768120/2013-9/Guangdong	Guangdong	3352	1	0
KF768121/2013-9/Guangdong	Guangdong	3352	0	1
KU556999/2014-10/Henan	Henan	0	0	1
KT208294/2014-9/Jiangxi	Jiangxi	0	0	1
MN026346/2018-11/Guangxi	Guangxi	0	0	1
MK943830/2015-12/Henan	Henan	0	0	1
JX014354/2011-2/Xinjiang	Xinjiang	0	0	1
KM377842/2014-1/Guangdong	Guangdong	3360	0	1
KX228517/2015-11/Guangdong	Guangdong	3360	1	0
KM377851/2013-1/Anhui	Anhui	0	0	1
KJ854746/2011-2/Yunnan	Yunnan	0	0	1
KP771751/2013-9/Beijing	Beijing	0	0	1
KP814042/2013-5/Shandong	Shandong	0	0	1
MK943826/2015-12/Hubei	Hubei	0	0	1
KR018765/2013-2/Guangdong	Guangdong	0	0	1
KR048689/2014-2/Fujian	Fujian	0	0	1
KY620015/2015-2/Chongqing	Chongqing	0	0	1
KF768108/2012-9/Guangdong	Guangdong	0	0	1
KU556994/2014-2/Henan	Henan	3372	1	0
KU556998/2014-2/Henan	Henan	3372	1	0
KY761961/2016-2/Henan	Henan	3372	0	1
KP771769/2012-9/Shandong	Shandong	0	0	1
KR080336/2015-2/Xinjiang	Xinjiang	0	0	1
KX815420/2015-11/Jiangxi	Jiangxi	0	0	1
KY129872/2016-5/Hebei	Hebei	0	0	1
KY488478/2016-12/Guangdong	Guangdong	0	0	1
KY508627/2016-7/Guangdong	Guangdong	0	0	1
KT208308/2014-9/Jiangxi	Jiangxi	0	0	1
KR018801/2014-7/Guangdong	Guangdong	0	0	1
MW651976/2019-8/Hubei	Hubei	0	0	1
JX876929/2011-2/Heilongjiang	Heilongjiang	0	0	1
HY2-GD-1107-GP5_Guangdong_20131107_China_zhanglab/2013-11/Guangdong	Guangdong	0	0	1
JQ715698/2011-2/Jiangsu	Jiangsu	0	0	1
MF095225/2013-9/Heilongjiang	Heilongjiang	0	0	1
MF095219/2013-9/InnerMongolia	InnerMongolia	0	0	1
MF095224/2013-9/Jiangsu	Jiangsu	0	0	1
KU215416/2015-9/Fujian	Fujian	3381	0	1
MN996888/2017-9/Fujian	Fujian	3381	1	0
MN996889/2017-12/Fujian	Fujian	3381	1	0
G140617_C0341_2-GP5_Guangdong_20140915_China_zhanglab/2014-9/Guangdong	Guangdong	3388	1	0
KT208323/2015-11/Guangdong	Guangdong	3388	0	1
KF768119/2013-9/Guangdong	Guangdong	0	0	1
MN660069/2014-9/Guangxi	Guangxi	0	0	1
KT022071/2014-9/Henan	Henan	0	0	1
KP771752/2013-9/Hebei	Hebei	0	0	1
KJ591659/2013-9/Henan	Henan	0	0	1
MT811839/2017-9/Yunnan	Yunnan	0	0	1
MN548293/2018-11/Henan	Henan	0	0	1
JX144913/2012-7/Hubei	Hubei	0	0	1
KF416325/2013-9/Henan	Henan	3394	1	0
KR902959/2014-12/Henan	Henan	3394	0	1
KR018767/2013-3/Guangdong	Guangdong	0	0	1
HQ832202/2010-2/Hubei	Hubei	0	0	1
JQ798259/2010-2/Zhejiang	Zhejiang	0	0	1
JQ798262/2010-2/Zhejiang	Zhejiang	0	0	1
JX217036/2011-3/Guangdong	Guangdong	3410	1	0
KC263029/2011-2/Guangdong	Guangdong	3410	1	0
JX235367/2011-9/Guangdong	Guangdong	3410	1	0
KC263028/2011-2/Guangdong	Guangdong	3410	0	1
MK943832/2015-12/Jiangxi	Jiangxi	0	0	1
KF416321/2013-9/Henan	Henan	0	0	1
KP771740/2013-9/Beijing	Beijing	0	0	1
M-2-gp5-20170123-Guangdong_2017_09_32_AM_China_zhanglab/2017-9/Guangdong	Guangdong	0	0	1
KY508628/2016-9/Guangdong	Guangdong	0	0	1
MK943897/2014-10/Hubei	Hubei	0	0	1
KP814044/2013-5/Shandong	Shandong	0	0	1
KR780218/2014-12/Henan	Henan	0	0	1
MT268940/2017-11/Sichuan	Sichuan	3421	1	0
MT268941/2017-11/Sichuan	Sichuan	3421	0	1
KT208312/2014-9/Jiangxi	Jiangxi	3422	1	0
KT208313/2014-9/Jiangxi	Jiangxi	3422	0	1
KX815421/2015-11/Jiangxi	Jiangxi	0	0	1
KP771743/2013-9/Beijing	Beijing	0	0	1
MK943835/2015-12/Hunan	Hunan	0	0	1
KX815427/2015-11/Sichuan	Sichuan	0	0	1
KY761963/2016-3/Henan	Henan	0	0	1
KM233867/2013-9/Shaanxi	Shaanxi	3430	1	0
KM233871/2013-9/Shaanxi	Shaanxi	3430	0	1
MK943896/2014-10/Hubei	Hubei	3431	1	0
MK943918/2012-10/Hubei	Hubei	3431	1	0
MK943919/2012-10/Hubei	Hubei	3431	0	1
KY426782/2014-12/Fujian	Fujian	0	0	1
KY508638/2016-7/Guangxi	Guangxi	0	0	1
MK943894/2015-10/Hubei	Hubei	3436	0	1
MK943895/2015-10/Hubei	Hubei	3436	1	0
MT811836/2016-12/Yunnan	Yunnan	3437	0	1
MT811838/2016-11/Yunnan	Yunnan	3437	1	0
KY927926/2017-2/Hebei	Hebei	0	0	1
MN306091/2015-11/Shandong	Shandong	0	0	1
MN547966/2019-4/Jiangsu	Jiangsu	0	0	1
KY488473/2016-12/Guangdong	Guangdong	0	0	1
KU898916/2015-12/Guangxi	Guangxi	0	0	1
KY798932/2016-12/Fujian	Fujian	0	0	1
MK943900/2014-10/Hubei	Hubei	3443	0	1
MK943901/2014-10/Hubei	Hubei	3443	1	0
MF095222/2014-9/Heilongjiang	Heilongjiang	0	0	1
JQ798287/2012-2/Zhejiang	Zhejiang	0	0	1
KY488470/2016-12/Guangdong	Guangdong	0	0	1
JX876922/2011-2/Heilongjiang	Heilongjiang	0	0	1
KT208315/2015-9/Guangdong	Guangdong	0	0	1
JX177644/2012-4/Jilin	Jilin	0	0	1
MK943836/2015-12/Hubei	Hubei	0	0	1
KP330232/2014-2/Hunan	Hunan	0	0	1
KR780216/2014-12/Henan	Henan	0	0	1
KR780225/2014-12/Henan	Henan	0	0	1
KR780229/2014-12/Henan	Henan	0	0	1
MT268919/2014-11/Sichuan	Sichuan	0	0	1
KR902958/2014-12/Henan	Henan	0	0	1
KR780226/2014-12/Henan	Henan	0	0	1
KR780231/2014-12/Henan	Henan	0	0	1
KT208333/2015-11/Jiangxi	Jiangxi	0	0	1
MF095227/2014-9/Zhejiang	Zhejiang	3456	0	1
MF095233/2014-9/Zhejiang	Zhejiang	3456	1	0
MK943833/2015-12/Hubei	Hubei	0	0	1
GU232735/2008-12/Guangdong	Guangdong	0	0	1
KY426780/2014-12/Fujian	Fujian	3462	0	1
KY426781/2014-12/Fujian	Fujian	3462	1	0
KJ019330/2013-6/Henan	Henan	0	0	1
KX767091/2015-11/Gansu	Gansu	0	0	1
MF095235/2014-9/Heilongjiang	Heilongjiang	0	0	1
JX144908/2011-2/Hubei	Hubei	0	0	1
MK943913/2013-10/Jiangxi	Jiangxi	3466	0	1
MK943914/2013-10/Jiangxi	Jiangxi	3466	1	0
HQ401282/2007-8/Shaanxi	Shaanxi	0	0	1
KT030975/2013-8/Sichuan	Sichuan	3468	1	0
KT030977/2013-10/Sichuan	Sichuan	3468	1	0
KT030989/2014-10/Sichuan	Sichuan	3468	0	1
KT030979/2013-11/Sichuan	Sichuan	3468	1	0
MT268959/2016-12/Sichuan	Sichuan	3468	1	0
KT030990/2014-5/Sichuan	Sichuan	3468	1	0
14GZHD-GP5_Guangdong_HuaDu_2014_China_zhanglab/2014-8/Guangdong	Guangdong	0	0	1
MF095232/2014-9/Heilongjiang	Heilongjiang	0	0	1
MK943909/2013-10/Hubei	Hubei	0	0	1
KX290692/2016-3/Guangdong	Guangdong	0	0	1
KX290693/2016-3/Henan	Henan	0	0	1
MK943908/2013-10/Hubei	Hubei	0	0	1
JX876926/2011-2/Heilongjiang	Heilongjiang	0	0	1
KP771735/2014-9/Beijing	Beijing	0	0	1
KT030966/2012-11/Sichuan	Sichuan	0	0	1
KY508631/2016-7/Guangdong	Guangdong	0	0	1
HM213863/2008-5/Guangdong	Guangdong	3490	1	0
KY508636/2016-7/Guangdong	Guangdong	3490	0	1
KF562286/2009-9/Jiangsu	Jiangsu	0	0	1
m-38-Hgs_Guangdong_2017_11_56_AM_China_zhanglab/2017-11/Guangdong	Guangdong	0	0	1
MK943945/2016-11/Jiangxi	Jiangxi	0	0	1
MK943927/2015-10/Jiangxi	Jiangxi	0	0	1
KR018778/2014-1/Guangdong	Guangdong	0	0	1
MF095220/2013-9/Jilin	Jilin	0	0	1
KY488471/2016-12/Guangdong	Guangdong	0	0	1
MK943837/2015-12/Jiangxi	Jiangxi	0	0	1
Guangdong7_2010_05_17_31-B_China_zhanglab/2010-5/Guangdong	Guangdong	0	0	1
HM213868/2008-5/Guangdong	Guangdong	3498	0	1
HM213887/2009-1/Guangdong	Guangdong	3498	1	0
HM213893/2009-1/Guangdong	Guangdong	3498	1	0
HM213894/2009-1/Guangdong	Guangdong	3498	1	0
HM213890/2009-1/Guangdong	Guangdong	3498	1	0
KR018782/2014-3/Guangdong	Guangdong	3504	0	1
KY508633/2016-7/Guangdong	Guangdong	3504	1	0
MT268926/2014-11/Sichuan	Sichuan	0	0	1
MK943871/2014-12/Hubei	Hubei	0	0	1
KX077657/2014-9/Guangxi	Guangxi	0	0	1
KX815434/2015-11/Zhejiang	Zhejiang	0	0	1
MK943907/2013-10/Hubei	Hubei	0	0	1
MN547964/2017-3/Jiangsu	Jiangsu	0	0	1
14HY-GP5_Guangdong_HeYuan_20114_China_zhanglab/2014-3/Guangdong	Guangdong	0	0	1
KM377847/2014-4/Fujian	Fujian	0	0	1
KT445876/2014-7/Henan	Henan	0	0	1
KR780217/2014-12/Henan	Henan	0	0	1
KU950373/2014-3/Henan	Henan	0	0	1
MF095221/2014-9/Heilongjiang	Heilongjiang	0	0	1
KT030983/2013-12/Sichuan	Sichuan	0	0	1
KP771756/2012-9/Beijing	Beijing	0	0	1
MK943824/2015-12/Hubei	Hubei	0	0	1
KP771781/2014-9/Hunan	Hunan	0	0	1
JN885606/2009-10/Guangdong	Guangdong	0	0	1
MT268923/2016-11/Sichuan	Sichuan	3520	1	0
MT268931/2017-11/Sichuan	Sichuan	3520	1	0
MT268936/2017-11/Sichuan	Sichuan	3520	1	0
MT268928/2017-11/Sichuan	Sichuan	3520	1	0
MT268952/2016-11/Sichuan	Sichuan	3520	0	1
JX144909/2012-7/Hubei	Hubei	0	0	1
KP179404/2015-9/Shanghai	Shanghai	0	0	1
HZ20115_20-GP5_Guangdong_Huizhou_2011_China_zhanglab/2011-5/Guangdong	Guangdong	0	0	1
KX815418/2015-11/Hunan	Hunan	0	0	1
KX077659/2014-9/Guangxi	Guangxi	0	0	1
KT208314/2015-9/Guangdong	Guangdong	0	0	1
KX429683/2016-5/Guangdong	Guangdong	0	0	1
KP284091/2014-4/Guangxi	Guangxi	0	0	1
KR612159/2015-1/Guangdong	Guangdong	0	0	1
KP771768/2012-9/Shandong	Shandong	0	0	1
KC263023/2011-2/Guangdong	Guangdong	0	0	1
KY488472/2016-12/Guangdong	Guangdong	0	0	1
G140617_C0341_1-GP5_Guangdong_20140915_China_zhanglab/2014-9/Guangdong	Guangdong	0	0	1
MK943886/2014-10/Hubei	Hubei	3537	1	0
MK943887/2015-10/Hubei	Hubei	3537	0	1
JQ798270/2011-2/Zhejiang	Zhejiang	0	0	1
KC454378/2010-2/Heilongjiang	Heilongjiang	0	0	1
JX235365/2011-5/Guangdong	Guangdong	0	0	1
KF768107/2012-9/Guangdong	Guangdong	0	0	1
MT811823/2017-8/Yunnan	Yunnan	3547	1	0
MT811834/2017-9/Yunnan	Yunnan	3547	0	1
KT030985/2014-1/Sichuan	Sichuan	3549	1	0
MT268958/2016-12/Sichuan	Sichuan	3549	0	1
MT268956/2016-12/Sichuan	Sichuan	3549	1	0
KT030987/2014-3/Sichuan	Sichuan	3549	1	0
MT268934/2017-11/Sichuan	Sichuan	3549	1	0
KT180169/2013-11/Beijing	Beijing	0	0	1
MK943881/2014-10/Hubei	Hubei	3553	0	1
MK943882/2015-10/Hubei	Hubei	3553	1	0
MK943902/2014-10/Jiangxi	Jiangxi	0	0	1
KM233864/2013-9/Sichuan	Sichuan	0	0	1
KC263027/2011-2/Guangdong	Guangdong	0	0	1
KU557002/2014-11/Henan	Henan	3556	0	1
KU557003/2014-11/Henan	Henan	0	0	1

## Sheet: TableS2
	Average annual temperature	Mean altitude	Absolute longtitude	Absolute latitude	GDP per capita	Gross provincial production	Entry-exit Animal and Animal Products Inspection and Quarantine Batches	Value of Entry-exit inspection and Quarantine of animals and animal Products	Per capita disposable income of all residents	Per capita meat consumption	Per capita consumption expenditure of all residents	Per capita pork sold by rural residents	Population density(inviduals per square kilometers	Gross population	Pork Pigs Slaughtered	Breeding stock	Pork production	Sample size
Beijing	13.439	365	116.396	39.9174	95690.4	19421.4	10905.9	30562.8	42697.6	25.3333	28600.8	21.5573	1173.52	1925.75	317.029	164.218	21.2355	50
Tianjin	13.3603	22	117.2	39.1528	62258	8252.7	17241.8	95686.1	27241.7	25.5667	20389.1	51.1655	1059.5	1267.8	336.925	194.811	25.6545	4
Hebei	14.3852	509	114.489	38.0443	29005.4	21062.2	12061.3	75228.5	15862.9	20.3167	11290.6	19.1845	378.944	7162.05	3520.3	2060.45	266.386	32
Shanxi	11.1499	1160	112.575	37.8829	29385.7	10247.5	1279.2	11371.3	15259.9	14.2667	10219.4	11.9164	221.676	3458.15	684.032	477.018	55.307	2
InnerMongolia	7.42319	999	111.618	40.8266	40685.8	9895.57	2688	13517.6	18978.2	33.2833	13946.2	16.4936	20.5287	2428.55	879.687	633.281	71.6575	4
Liaoning	8.47678	224	123.396	41.8132	37058.8	15966.1	43501.2	245754	20485.2	26.2833	14697.8	61.4236	290.395	4297.85	2267.54	1427.04	205.171	6
Jilin	6.44424	404	125.341	43.9089	28764.5	7452.44	4424.3	13365.8	15963.7	21.55	11774.5	42.1764	140.467	2632.35	1386.08	871.189	116.35	12
Heilongjiang	5.01829	313	126.663	45.7395	26157.7	9281.66	1642.8	9109.63	15806.5	22.2833	11819.5	40.3636	76.5803	3622.25	1532.89	1284.73	122.204	49
Shanghai	17.7837	4	121.45	31.2232	93762.8	21861.8	50639	252366	44213.5	29.2667	30919.6	6.42545	3539.43	2244	266.339	139.988	15.5205	6
Jiangsu	16.6332	15	118.781	32.0614	65965.8	54112.9	33968.8	211641	25667.5	26.25	17571.6	22.95	748.26	8021.35	2772.2	1681.12	205.379	57
Zhejiang	17.8189	303	120.113	30.2506	59257.2	34659.8	34170.4	215534	31364.2	27.5167	21219.8	61.8909	533.284	5626.15	1553.55	977.832	108.773	86
Anhui	16.5915	195	117.262	31.8676	31065.7	18821.9	1806.2	10320.6	15920.6	24.7833	11404.5	19.3355	433.719	6076.4	2627.97	1548.7	226.706	57
Fujian	20.7735	482	119.277	26.0889	54055.9	21300	19265.5	141240	22132	30.3167	16269.7	35.6327	307.935	3818.4	1698.73	1144.36	130.926	69
Jiangxi	18.8701	246	115.897	28.6692	29014.3	12977.5	5553.2	11965.8	16032.4	27.4833	10816	29.3891	265.231	4426.7	2576.54	1516.84	210.68	70
Shandong	14.9766	90	118	36.5139	42458.4	41638.9	89487.9	587690	19662.2	21	12744	32.4864	611.085	9655.15	4206.5	2835.69	353.651	77
Henan	16.0593	246	113.657	34.7333	29882.8	28922.7	8006.1	40586	14662.1	16.7	10148.2	41.6545	576.521	9627.9	5225.16	4237.34	411.526	114
Hubei	17.0326	431	114.286	30.583	39229.2	22822	3444.5	13864.6	17028.8	26.75	12552.4	29.0691	310.729	5776.45	3524.99	2351.01	281.053	104
Hunan	17.9133	357	112.971	28.1989	32255.8	21184.7	4548.5	18124.7	16910.8	30.5333	12656.5	42.0409	309.646	6558.3	5674.67	3944.26	410.274	28
Guangdong	22.1596	218	113.388	23.0538	52245.7	59138.7	154192	472872	24690.6	37.0833	18458.1	26.8682	600.289	10805.2	3409.65	2099.98	255.796	281
Guangxi	21.696	395	108.233	22.7821	23615.2	11422.7	7493.3	24875.3	14564.2	30.75	10036.9	39.4527	204.252	4820.35	2975.01	2369.26	224.284	124
Hainan	24.6552	191	110.161	19.5027	30349.1	2842.21	3696.4	29064.5	16352.6	28.2833	11699.7	28.7536	265.691	903.35	438.537	366.896	37.501	2
Chongqing	19.0353	730	106.553	29.5628	39633.2	12117.9	3863.1	11484.3	17566.7	39.5	13202.8	45.0227	361.385	2974.2	1875.9	1456.6	138.749	19
Sichuan	17.2371	2560	104.111	30.6833	29182	24009.3	10071.1	37506.7	14971.2	39.4	11683.1	60.3691	170.129	8190	6553.72	4916.92	469.779	48
Guizhou	14.7843	1108	106.72	26.6197	21157.3	7913.28	419.8	483.937	11962	29.8167	8938.82	26.2555	211.222	3717.5	1566.78	1618.11	146.161	6
Yunnan	16.1964	1892	102.675	25.0514	25211.2	11711.5	5885	5984.19	13230.4	30.5833	9625.41	34.2182	119.611	4584.7	2923.69	2672.48	262.079	25
Shaanxi	13.8416	1130	108.956	34.2657	35180	13534.6	1109.5	2153.89	14906.5	14.7333	11082.2	17.1627	184.54	3794.15	1005.79	836.316	79.0825	8
Gansu	7.98891	2158	103.946	36.0318	19962.5	5045.07	275.3	2237.14	11621.6	18.3667	9474.12	7.38909	55.7493	2533.25	653.746	587.253	48.796	14
Qinghai	6.15263	4049	101.702	36.5821	27101.8	1559.73	54.2	478.191	13700	25	11347.1	3.54455	7.83193	565.7	117.478	100.419	8.4425	1
Ningxia	10.5607	1559	106.239	38.1589	30058.7	2031.05	191.5	2648.65	15052.1	16.3833	11387.5	13.8255	98.1476	651.7	120.544	87.0305	8.484	5
Xinjiang	7.74253	1904	87.5546	43.77	31133.7	7313.95	2327.3	7711.11	14179.6	23.05	10871.1	2.26455	13.5756	2253.55	345.947	246.493	28.744	11

## Sheet: TableS3
location	Beijing	Tianjin	Hebei	Shanxi	InnerMongolia	Liaoning	Jilin	Heilongjiang	Shanghai	Jiangsu	Zhejiang	Anhui	Fujian	Jiangxi	Shandong	Henan	Hubei	Hunan	Guangdong	Guangxi	Hainan	Chongqing	Sichuan	Guizhou	Yunnan	Shaanxi	Gansu	Qinghai	Ningxia	Xinjiang
Beijing	0	96.1	239.5	407.3	424.5	630.7	867.2	1056.8	1042	860.7	1368	897.8	1527.5	1242.8	356.9	620.2	1041.3	1316	1856.6	2047.3	2249.5	1419.3	1505.9	1729.6	2594	907.9	1184.7	1340.8	884.2	2772
Tianjin	96.1	0	269.6	1107	642	673	956	1226	1106	909	1148	834.9	1456.6	1338	315	606.3	1127	1459	1814	2027.1	2216.9	1429.2	1846	1727.5	2565	1104	1245.1	1684	1163	2901
Hebei	239.5	269.6	0	181.4	370.2	856.8	1103.2	1296	997.8	766.9	1268	769.6	1409.2	1077.2	299.7	404.4	853.9	1113.5	1666.8	1825.8	2042.5	1180.4	1550	1494.8	2317	670.1	983.3	1150.3	712.9	2882
Shanxi	407.3	1107	181.4	0	336.8	1034.3	1274.4	2295	1383	830.4	1488	803.5	1432.8	1068	434.2	356.1	818.2	1048.9	1611.5	1722.8	1961.2	1426.1	737	1364.2	1476	608	803.5	973.2	547.9	2530
InnerMongolia	424.5	642	370.2	336.8	0	1000.4	1188	1334.5	1667.2	1132.8	1669.9	1123.6	1759.8	1397	666	692.8	1154.9	1380.1	1943.8	2026.5	2280.5	1290.4	1733.1	1639.1	2472.7	969.1	848.6	978	514.2	2298
Liaoning	630.7	673	856.8	1034.3	1000.4	0	279.1	507.3	1748	1134.9	1747	1234.2	1757.9	1615	782.3	1163.8	1483	1774.8	2254.5	2540.1	2688.1	2004.2	2486	2283.7	3222	1744	1812.4	1962.8	1500.4	3448
Jilin	867.2	956	1103.2	1274.4	1188	279.1	0	231	2195	1410.2	2142	1512	2021.6	1892.8	1057.2	1433.2	1762	2053.7	2532.2	2818.6	2966.9	2268.6	2879	2555.8	3616	2137	2025.8	2165	1700.5	3798
Heilongjiang	1056.8	1226	1296	2295	1334.5	507.3	231	0	2312	1640.9	2298	1741.5	2251.5	2122.3	1275.8	1644.2	1987	2278.4	2761.8	3041.4	3195	2471.9	3036	2767.8	3773	2295	2182	2310.6	1848.5	3956
Shanghai	1042	1106	997.8	1383	1667.2	1748	2195	2312	0	106	176	394	602.9	687	816	825.3	821	1050	1206.3	1617.4	1662.8	1426.1	1959	1544.5	2312	1363	1733.6	2212	1890	3892
Jiangsu	860.7	909	766.9	830.4	1132.8	1134.9	1410.2	1640.9	106	0	276	134.3	669.4	491.5	504.7	543.1	449.2	713.4	1125.7	1469.1	1570.2	1170.9	1660	1328.7	2076	1064	1447.8	1633.9	1315.8	3590
Zhejiang	1368	1148	1268	1488	1669.9	1747	2142	2298	176	276	0	423	612	516	851	922	704	882	1248	1714	1817	1570	1837	1645	2154	1323	1957	2174	1875	3913
Anhui	897.8	834.9	769.6	803.5	1123.6	1234.2	1512	1741.5	394	134.3	423	0	639.7	380.8	543.5	480.6	314.7	582	1020.4	1342.7	1457.5	1040.9	1258.8	1194.1	1917.3	856.3	1358.8	1544.3	1253.5	3455.3
Fujian	1527.5	1456.6	1409.2	1432.8	1759.8	1757.9	2021.6	2251.5	602.9	669.4	612	639.7	0	444.4	1170.6	1088.2	685.9	692.5	695	1183.5	1138.2	1304.5	1560.4	1274.4	2041.4	1362.6	1858.7	2034.6	1828	4135.7
Jiangxi	1242.8	1338	1077.2	1068	1397	1615	1892.8	2122.3	687	491.5	516	380.8	444.4	0	900.9	704.8	225	291.9	639.6	990.3	1079.1	887	1462.8	930.7	1632.2	1068	1415.5	1590.5	1401.8	3593.7
Shandong	356.9	315	299.7	434.2	666	782.3	1057.2	1275.8	816	504.7	851	543.5	1170.6	900.9	0	391.4	723	1010.6	1528.6	1767.3	1940.1	1034.6	1638.2	1502.2	2292.2	896.4	803.5	1389.3	981.1	3098.5
Henan	620.2	606.3	404.4	356.1	692.8	1163.8	1433.2	1644.2	825.3	543.1	922	480.6	1088.2	704.8	391.4	0	463.2	710	1267.1	1427.1	1638.1	844	1227.1	1123.6	1929.7	445.2	915.7	1101.5	774.9	2968.4
Hubei	1041.3	1127	853.9	818.2	1154.9	1483	1762	1987	821	449.2	704	314.7	685.9	225	723	463.2	0	291.8	815.7	1059.2	1217.2	740.5	1145.6	879.8	1551.2	737.7	1176.7	1355.7	1147.8	3263.4
Hunan	1316	1459	1113.5	1048.9	1380.1	1774.8	2053.7	2278.4	1050	713.4	882	582	692.5	291.9	1010.6	710	291.8	0	563.8	768.1	933.8	612.1	1196.5	641.6	1279.6	980	1227.9	1390.8	1278	3505.7
Guangdong	1856.6	1814	1666.8	1611.5	1943.8	2254.5	2532.2	2761.8	1206.3	1125.7	1248	1020.4	695	639.6	1528.6	1267.1	815.7	563.8	0	512.4	456.8	978.7	1216.6	770.7	1340.5	1312.4	1715.5	1857.4	1816.7	4140.6
Guangxi	2047.3	2027.1	1825.8	1722.8	2026.5	2540.1	2818.6	3041.4	1617.4	1469.1	1714	1342.7	1183.5	990.3	1767.3	1427.1	1059.2	768.1	512.4	0	344.2	808.5	973.6	466.7	783.7	1301.9	1575.8	1677.3	1768.4	3798.7
Hainan	2249.5	2216.9	2042.5	1961.2	2280.5	2688.1	2966.9	3195	1662.8	1570.2	1817	1457.5	1138.2	1079.1	1940.1	1638.1	1217.2	933.8	456.8	344.2	0	1127.5	1686.8	803.7	1225.6	1583.4	1899.2	2009.7	2068.6	4279.3
Chongqing	1419.3	1429.2	1180.4	1426.1	1290.4	2004.2	2268.6	2471.9	1426.1	1170.9	1570	1040.9	1304.5	887	1034.6	844	740.5	612.1	978.7	808.5	1127.5	0	257.3	360.9	830.8	544.7	771.8	891	966.9	2928.4
Sichuan	1505.9	1846	1550	737	1733.1	2486	2879	3036	1959	1660	1837	1258.8	1560.4	1462.8	1638.2	1227.1	1145.6	1196.5	1216.6	973.6	1686.8	257.3	0	507.5	810.8	728.5	629.8	1075.2	1191.8	2821.8
Guizhou	1729.6	1727.5	1494.8	1364.2	1639.1	2283.7	2555.8	2767.8	1544.5	1328.7	1645	1194.1	1274.4	930.7	1502.2	1123.6	879.8	641.6	770.7	466.7	803.7	360.9	507.5	0	514.8	894.7	1113.5	1210.7	1327.2	3307.7
Yunnan	2594	2565	2317	1476	2472.2	3222	2616	3773	2312	2076	2154	1917.3	2041.4	1632.2	2292.2	1929.7	1551.2	1279.6	1340.5	783.7	1225.6	830.8	810.8	514.8	0	1467.6	1666.6	1870.7	1932.4	3560.3
Shaanxi	907.9	1104	670.1	608	969.1	1744	2137	2295	1363	1064	1323	856.3	1362.6	1068	896.4	445.2	737.7	980	1312.4	1301.9	1583.4	544.7	728.5	894.7	1467.6	0	505.6	858.1	625.8	2595
Gansu	1184.7	1245.1	983.3	803.5	848.6	1812.4	2025.8	2182	1733.6	1447.8	1957	1358.8	1858.7	1415.5	803.5	915.7	1176.7	1227.9	1715.5	1575.8	1899.2	771.8	629.8	1113.5	1666.6	505.6	0	186.2	341.9	1963.1
Qinghai	1340.8	1684	1150.3	973.2	978	1962.8	2165	2310.6	2212	1633.9	2174	1544.3	2034.6	1590.5	1389.3	1101.5	1355.7	1390.8	1857.4	1677.3	2009.7	891	1075.2	1210.7	1870.7	858.1	186.2	0	464.6	1805.2
Ningxia	884.2	1163	712.9	547.9	514.2	1500.4	1700.5	1848.5	1890	1315.8	1875	1253.5	1828	1401.8	981.1	774.9	1147.8	1278	1816.7	1768.4	2068.6	966.9	1191.8	1327.2	1932.4	625.8	341.9	464.6	0	2160.6
Xinjiang	2772	2901	2882	2530	2298	3448	3798	3956	3892	3590	3913	3455.3	4135.7	3593.7	3098.5	2968.4	3263.4	3505.7	4140.6	3798.7	4279.3	2928.4	2821.8	3307.7	3560.3	2595	1963.1	1805.2	2160.6	0
